# Supplementary material
Source: PubMed Central journal article supplement (PMC6693664)
Supplement: NIHMS1535282-supplement-1.pdf [file NIHMS1535282-supplement-1.pdf]

## SUPPLEMENT

### **Combined estimation of disease progression and retention on antiretroviral therapy among treated individuals with HIV in the USA: a modelling study**

Linwei Wang, MSc<sup>†</sup> [1], Emanuel Krebs, MA<sup>†</sup> [1], Jeong E Min, MSc [1], W. Christopher Mathews, MD [2], Ank Nijhawan, MD [3], Charurut Somboonwit, MD\* [4], Judith A. Aberg, MD\* [5], Richard D Moore, MD\* [6], Kelly A. Gebo, MD\* [6], Bohdan Nosyk, PhD [1,7], for the HIV Research Network

1. Health Economic Research Unit at the British Columbia Centre for Excellence in HIV/AIDS, Vancouver, BC; 2. Department of Medicine, University of California San Diego, San Diego, CA; 3. Department of Internal Medicine, University of Texas Southwestern Medical Center, Dallas, TX; 4. Department of Internal Medicine, University of South Florida Morsani College of Medicine, Tampa, FL; 5. Department of Medicine, Icahn School of Medicine at Mount Sinai, New York, NY; 6. Johns Hopkins University School of Medicine, Baltimore, MD; 7. Faculty of Health Sciences, Simon Fraser University, Burnaby, BC.

<sup>†</sup>Wang and Krebs have contributed equally to this manuscript; \* Full Professors.

## **HIV Research Network Acknowledgements:**

### **Participating Sites**

Alameda County Medical Center, Oakland, California (Howard Edelstein, M.D.)  
Children's Hospital of Philadelphia, Philadelphia, Pennsylvania (Richard Rutstein, M.D.)  
Drexel University, Philadelphia, Pennsylvania (Amy Baranoski, M.D., Sara Allen, C.R.N.P.)  
Fenway Health, Boston, Massachusetts (Stephen Boswell, M.D., Kenneth Mayer, M.D.)  
Johns Hopkins University, Baltimore, Maryland (Kelly Gebo, M.D., Richard Moore, M.D., Allison Agwu M.D.)  
Montefiore Medical Group, Bronx, New York (Robert Beil, M.D.)  
Montefiore Medical Center, Bronx, New York (Uriel Felsen, M.D.)  
Mount Sinai St. Luke's and Mount Sinai West, New York, New York (Judith Aberg, M.D., Antonio Urbina, M.D.)  
Oregon Health and Science University, Portland, Oregon (P. Todd Korthuis, M.D.)  
Parkland Health and Hospital System, Dallas, Texas (Ank Nijhawan, M.D., Muhammad Akbar, M.D.)  
St. Jude's Children's Research Hospital and University of Tennessee, Memphis, Tennessee (Aditya Gaur, M.D.)  
Tampa General Health Care, Tampa, Florida (Charurut Somboonwit, M.D.)  
Trillium Health, Rochester, New York (William Valenti, M.D.)  
University of California, San Diego, California (W. Christopher Mathews, M.D.)

### **Sponsoring Agencies**

Agency for Healthcare Research and Quality, Rockville, Maryland (Fred Hellinger, Ph.D., John Fleishman, Ph.D.)  
Health Resources and Services Administration, Rockville, Maryland (Robert Mills, Ph.D.)

### **Data Coordinating Center**

Johns Hopkins University (Richard Moore, M.D., Jeanne Keruly, C.R.N.P., Kelly Gebo, M.D., Cindy Voss, M.A., Charles Collins, M.P.H., Rebeca Diaz-Reyes, M.S.P.H.)

**Supplement Table 1. Characteristics of the HIV Research Network included and excluded study participants.**

| Characteristics                         | Total<br>N=38,472 (100%) | Included<br>n=32,242 (83.8%) | Excluded                     |                                      |                                       |
|-----------------------------------------|--------------------------|------------------------------|------------------------------|--------------------------------------|---------------------------------------|
|                                         |                          |                              | Sub-total<br>n=6,230 (16.2%) | Missing covariates<br>n=2,854 (7.4%) | Single observation*<br>n=3,376 (8.8%) |
| Age at study entry (Median (IQR))       | 44.2 [34.5, 51.1]        | 44.4 [35.0, 51.1]            | 43.1 [32.0, 50.7]            | 44.7 [34.8, 51.8]                    | 41.2 [30.6, 49.7]                     |
| Follow-up in years (Median (IQR))       | 4.3 [2.0, 6.0]           | 4.9 [2.6, 6.0]               | 1.2 [0.5, 3.6]               | 3.8 [2.0, 5.5]                       | 0.6 [0.3, 1.0]                        |
| Female                                  | 9,250 (24.0%)            | 7,937 (24.6%)                | 1,313 (21.1%)                | 689 (24.1%)                          | 624 (18.5%)                           |
| Male                                    | 29,222 (76.0%)           | 24,305 (75.4%)               | 4,917 (78.9%)                | 2,165 (75.9%)                        | 2,752 (81.5%)                         |
| Region                                  |                          |                              |                              |                                      |                                       |
| <i>Northeast</i>                        | 17,024 (44.3%)           | 13,563 (42.1%)               | 3,461 (55.6%)                | 1,834 (64.3%)                        | 1,627 (48.2%)                         |
| <i>South</i>                            | 15,091 (39.2%)           | 13,345 (41.4%)               | 1,746 (28.0%)                | 523 (18.3%)                          | 1,223 (36.2%)                         |
| <i>West</i>                             | 6,357 (16.5%)            | 5,334 (16.5%)                | 1,023 (16.4%)                | 497 (17.4%)                          | 526 (15.6%)                           |
| Race/ethnicity                          |                          |                              |                              |                                      |                                       |
| <i>Black</i>                            | 17,076 (44.7%)           | 14,565 (45.2%)               | 2,511 (42.0%)                | 1,081 (40.4%)                        | 1,430 (43.2%)                         |
| <i>Hispanic / Latino</i>                | 8,924 (23.3%)            | 7,496 (23.2%)                | 1,428 (23.9%)                | 731 (27.3%)                          | 697 (21.1%)                           |
| <i>non-Hispanic white / others</i>      | 12,227 (32.0%)           | 10,181 (31.6%)               | 2,046 (34.2%)                | 865 (32.3%)                          | 1,181 (35.7%)                         |
| HIV risk group                          |                          |                              |                              |                                      |                                       |
| <i>MSM</i>                              | 18,317 (49.0%)           | 15,595 (48.4%)               | 2,722 (52.7%)                | 1,012 (51.0%)                        | 1,710 (53.8%)                         |
| <i>PWID</i>                             | 3,708 (9.9%)             | 3,278 (10.2%)                | 430 (8.3%)                   | 186 (9.4%)                           | 244 (7.7%)                            |
| <i>MWID</i>                             | 1,070 (2.9%)             | 951 (2.9%)                   | 119 (2.3%)                   | 43 (2.2%)                            | 76 (2.4%)                             |
| <i>HET</i>                              | 14,312 (38.3%)           | 12,418 (38.5%)               | 1,894 (36.7%)                | 743 (37.4%)                          | 1,151 (36.2%)                         |
| Year of diagnosis                       |                          |                              |                              |                                      |                                       |
| ≤1996                                   | 10,564 (28.0%)           | 9,210 (28.6%)                | 1,354 (24.8%)                | 695 (30.8%)                          | 659 (20.6%)                           |
| 1997-2006                               | 14,243 (37.8%)           | 12,636 (39.2%)               | 1,607 (29.4%)                | 810 (35.9%)                          | 797 (24.9%)                           |
| 2007-2015                               | 12,898 (34.2%)           | 10,396 (32.2%)               | 2,502 (45.8%)                | 754 (33.4%)                          | 1,748 (54.6%)                         |
| Year of ART initiation                  |                          |                              |                              |                                      |                                       |
| ≤1996                                   | 2,078 (5.4%)             | 1,880 (5.8%)                 | 198 (3.2%)                   | 156 (5.5%)                           | 42 (1.2%)                             |
| 1997-2006                               | 9,940 (25.8%)            | 9,416 (29.2%)                | 524 (8.4%)                   | 329 (11.5%)                          | 195 (5.8%)                            |
| 2007-2015                               | 15,940 (41.4%)           | 13,325 (41.3%)               | 2,615 (42.0%)                | 807 (28.3%)                          | 1,808 (53.6%)                         |
| Unknown                                 | 10,514 (27.3%)           | 7,621 (23.6%)                | 2,893 (46.4%)                | 1,562 (54.7%)                        | 1,331 (39.4%)                         |
| No prior ART utilization at study entry | 10,152 (26.6%)           | 8,342 (25.9%)                | 1,810 (30.5%)                | 454 (17.7%)                          | 1,356 (40.2%)                         |
| Year of enrollment at HIVRN clinics     |                          |                              |                              |                                      |                                       |
| ≤1996                                   | 2,034 (5.3%)             | 1,881 (5.8%)                 | 153 (2.5%)                   | 119 (4.2%)                           | 34 (1.0%)                             |
| 1997-2006                               | 12,501 (32.5%)           | 11,769 (36.5%)               | 732 (11.8%)                  | 528 (18.5%)                          | 204 (6.0%)                            |
| 2007-2015                               | 23,935 (62.2%)           | 18,591 (57.7%)               | 5,344 (85.8%)                | 2,206 (77.3%)                        | 3,138 (93.0%)                         |
| CD4 cell count at diagnosis             |                          |                              |                              |                                      |                                       |
| ≥500                                    | 2,937 (7.6%)             | 2,491 (7.7%)                 | 446 (7.2%)                   | 102 (3.6%)                           | 344 (10.2%)                           |
| 200-499                                 | 4,997 (13.0%)            | 4,447 (13.8%)                | 550 (8.8%)                   | 154 (5.4%)                           | 396 (11.7%)                           |
| <200                                    | 4,057 (10.6%)            | 3,648 (11.3%)                | 409 (6.6%)                   | 146 (5.1%)                           | 263 (7.8%)                            |
| Unknown                                 | 26,481 (68.8%)           | 21,656 (67.2%)               | 4,825 (77.4%)                | 2,452 (85.9%)                        | 2,373 (70.3%)                         |
| CD4 cell count at ART initiation        |                          |                              |                              |                                      |                                       |
| ≥500                                    | 3,667 (9.5%)             | 3,011 (9.3%)                 | 656 (10.5%)                  | 155 (5.4%)                           | 501 (14.8%)                           |
| 200-499                                 | 8,085 (21.0%)            | 7,211 (22.4%)                | 874 (14.0%)                  | 239 (8.4%)                           | 635 (18.8%)                           |
| <200                                    | 5,938 (15.4%)            | 5,363 (16.6%)                | 575 (9.2%)                   | 216 (7.6%)                           | 359 (10.6%)                           |
| Unknown                                 | 20,782 (54.0%)           | 16,657 (51.7%)               | 4,125 (66.2%)                | 2,244 (78.6%)                        | 1,881 (55.7%)                         |
| Status at end of study                  |                          |                              |                              |                                      |                                       |
| <i>Dead</i>                             | 1,484 (3.9%)             | 1,325 (4.1%)                 | 159 (2.6%)                   | 100 (3.5%)                           | 59 (1.7%)                             |
| <i>Lost to follow-up</i>                | 6,244 (16.2%)            | 4,268 (13.2%)                | 1,976 (31.7%)                | 504 (17.7%)                          | 1,472 (43.6%)                         |

MSM: men who have sex with men; PWID: people who inject drugs; MWID: MSM who inject drugs;

HET: heterosexual; ART: Antiretroviral treatment; HIVRN: HIV Research Network;

CD4: CD4+ T-lymphocyte cell count per  $\mu\text{L}$ .

\* Single observed disease status measurement

**Supplement Table 2. Multivariate multi-state Markov model results of disease progression during ART, mortality and ART engagement from the full study sample (N=32,242)**

| Transitions                  | HET female              |                         | MSM                     | Black                     | Hispanic/Latino         | PWID                    | No prior ART*           | Age                     | Time since dx           | log(pVL)                | South                   | West         |
|------------------------------|-------------------------|-------------------------|-------------------------|---------------------------|-------------------------|-------------------------|-------------------------|-------------------------|-------------------------|-------------------------|-------------------------|--------------|
|                              | Reference               | HET male                |                         | non-Hispanic white/others |                         | non-PWID                | Prior ART               | per 10 years            | per year                | per unit                | Northeast               |              |
|                              | aHR (95% CI)            | aHR (95% CI)            | aHR (95% CI)            | aHR (95% CI)              | aHR (95% CI)            | aHR (95% CI)            | aHR (95% CI)            | aHR (95% CI)            | aHR (95% CI)            | aHR (95% CI)            | aHR (95% CI)            | aHR (95% CI) |
| CD4 improvement during ART   |                         |                         |                         |                           |                         |                         |                         |                         |                         |                         |                         |              |
| <200 to 200-499              | <b>1.37 (1.24,1.51)</b> | <b>1.25 (1.14,1.37)</b> | 1.08 (0.98,1.19)        | 1.06 (0.95,1.18)          | 0.98 (0.88,1.10)        | <b>1.39 (1.26,1.53)</b> | 1.02 (0.99,1.06)        | <b>0.99 (0.98,1.00)</b> | <b>0.96 (0.95,0.98)</b> | <b>1.16 (1.07,1.26)</b> | 1.05 (0.94,1.17)        |              |
| 200-499 to ≥500              | <b>1.35 (1.26,1.45)</b> | <b>1.10 (1.03,1.18)</b> | 0.98 (0.92,1.05)        | <b>0.93 (0.87,1.00)</b>   | 0.97 (0.90,1.05)        | <b>1.31 (1.22,1.40)</b> | <b>0.92 (0.90,0.94)</b> | <b>0.99 (0.99,1.00)</b> | <b>0.98 (0.96,0.99)</b> | <b>0.85 (0.80,0.89)</b> | <b>0.84 (0.78,0.90)</b> |              |
| CD4 deterioration during ART |                         |                         |                         |                           |                         |                         |                         |                         |                         |                         |                         |              |
| ≥500 to 200-499              | <b>0.71 (0.65,0.77)</b> | <b>0.85 (0.79,0.91)</b> | <b>1.13 (1.06,1.22)</b> | <b>1.18 (1.09,1.27)</b>   | <b>1.23 (1.13,1.33)</b> | <b>0.86 (0.78,0.94)</b> | <b>1.03 (1.00,1.06)</b> | <b>1.01 (1.00,1.01)</b> | <b>1.08 (1.07,1.10)</b> | <b>1.18 (1.11,1.26)</b> | <b>1.18 (1.09,1.28)</b> |              |
| 200-499 to <200              | 1.12 (1.00,1.26)        | <b>0.82 (0.74,0.92)</b> | 1.11 (0.99,1.25)        | 1.02 (0.90,1.15)          | <b>1.23 (1.10,1.38)</b> | <b>0.84 (0.73,0.95)</b> | 1.00 (0.96,1.05)        | <b>1.02 (1.02,1.03)</b> | <b>1.19 (1.17,1.21)</b> | 1.01 (0.91,1.11)        | 1.04 (0.92,1.19)        |              |
| ART dropout                  |                         |                         |                         |                           |                         |                         |                         |                         |                         |                         |                         |              |
| ≥500 to off-ART              | 1.04 (0.95,1.12)        | <b>0.88 (0.81,0.95)</b> | 0.97 (0.90,1.04)        | <b>0.73 (0.67,0.80)</b>   | <b>1.36 (1.25,1.49)</b> | 1.10 (1.00,1.20)        | <b>0.88 (0.86,0.91)</b> | <b>1.01 (1.00,1.01)</b> | <b>0.98 (0.97,1.00)</b> | <b>2.45 (2.29,2.62)</b> | <b>1.66 (1.51,1.82)</b> |              |
| 200-499 to off-ART           | <b>1.14 (1.04,1.23)</b> | <b>0.89 (0.82,0.96)</b> | <b>1.12 (1.03,1.21)</b> | <b>0.91 (0.83,1.00)</b>   | <b>1.45 (1.34,1.58)</b> | 0.92 (0.84,1.01)        | <b>0.83 (0.81,0.86)</b> | <b>1.00 (1.00,1.01)</b> | <b>1.01 (1.00,1.03)</b> | <b>1.95 (1.81,2.10)</b> | <b>1.41 (1.27,1.56)</b> |              |
| <200 to off-ART              | 1.00 (0.89,1.13)        | 0.91 (0.82,1.02)        | <b>1.23 (1.09,1.39)</b> | 0.89 (0.77,1.03)          | <b>1.42 (1.26,1.61)</b> | <b>0.73 (0.64,0.84)</b> | <b>0.89 (0.85,0.93)</b> | 1.00 (0.99,1.01)        | <b>1.03 (1.01,1.05)</b> | <b>1.91 (1.71,2.13)</b> | <b>1.29 (1.10,1.51)</b> |              |
| ART re-initiation            |                         |                         |                         |                           |                         |                         |                         |                         |                         |                         |                         |              |
| Off-ART to ≥500 on-ART       | <b>1.39 (1.27,1.52)</b> | <b>1.25 (1.14,1.38)</b> | 1.02 (0.94,1.12)        | <b>1.20 (1.08,1.32)</b>   | <b>0.88 (0.79,0.96)</b> | <b>1.14 (1.03,1.26)</b> | <b>1.09 (1.05,1.13)</b> | <b>1.00 (0.99,1.00)</b> | <b>0.86 (0.84,0.87)</b> | <b>1.30 (1.21,1.41)</b> | <b>0.49 (0.43,0.55)</b> |              |
| Off-ART to 200-499 on-ART    | 1.02 (0.93,1.11)        | 1.02 (0.93,1.12)        | <b>1.16 (1.05,1.27)</b> | <b>1.37 (1.23,1.52)</b>   | 1.02 (0.93,1.12)        | 0.86 (0.78,0.96)        | <b>1.04 (1.01,1.08)</b> | <b>1.00 (0.99,1.00)</b> | <b>1.04 (1.02,1.05)</b> | <b>1.43 (1.32,1.55)</b> | <b>0.59 (0.52,0.67)</b> |              |
| Off-ART to <200 on-ART       | <b>0.81 (0.73,0.90)</b> | <b>0.82 (0.74,0.91)</b> | <b>1.39 (1.24,1.57)</b> | <b>1.55 (1.36,1.77)</b>   | 0.94 (0.84,1.05)        | <b>0.60 (0.52,0.68)</b> | 1.03 (0.99,1.08)        | 1.00 (0.99,1.01)        | <b>1.24 (1.22,1.26)</b> | <b>1.79 (1.62,1.99)</b> | 0.94 (0.80,1.09)        |              |
| Mortality                    |                         |                         |                         |                           |                         |                         |                         |                         |                         |                         |                         |              |
| ≥500 to death                | 0.77 (0.51,1.15)        | 0.80 (0.53,1.20)        | 0.88 (0.61,1.26)        | <b>0.50 (0.31,0.83)</b>   | <b>2.31 (1.62,3.29)</b> | 0.76 (0.42,1.36)        | <b>1.57 (1.34,1.84)</b> | 1.01 (0.98,1.03)        | 1.03 (0.94,1.12)        | 1.24 (0.89,1.73)        | 1.05 (0.68,1.63)        |              |
| 200-499 to death             | 1.01 (0.75,1.38)        | <b>0.70 (0.51,0.95)</b> | 0.81 (0.60,1.08)        | <b>0.54 (0.38,0.78)</b>   | <b>1.56 (1.18,2.06)</b> | 0.91 (0.60,1.36)        | <b>1.85 (1.64,2.10)</b> | <b>1.02 (1.00,1.04)</b> | 1.03 (0.98,1.09)        | 1.12 (0.86,1.46)        | 1.28 (0.93,1.76)        |              |
| <200 to death                | 1.08 (0.85,1.37)        | 1.12 (0.90,1.40)        | 0.90 (0.72,1.13)        | <b>0.77 (0.59,1.01)</b>   | <b>1.61 (1.30,2.00)</b> | 0.93 (0.72,1.21)        | <b>1.48 (1.34,1.63)</b> | 1.00 (0.98,1.01)        | <b>1.08 (1.04,1.12)</b> | <b>1.93 (1.56,2.40)</b> | 1.37 (1.02,1.84)        |              |
| Off-ART to death             | 1.34 (0.80,2.22)        | 1.21 (0.70,2.08)        | 0.63 (0.39,1.01)        | 0.74 (0.41,1.33)          | 1.36 (0.86,2.16)        | 0.75 (0.36,1.54)        | <b>2.05 (1.68,2.51)</b> | 1.00 (0.97,1.03)        | <b>1.16 (1.07,1.25)</b> | 1.15 (0.76,1.76)        | <b>0.38 (0.18,0.80)</b> |              |

**Bold indicates statistically significant adjusted hazard ratios at p<0.05**

ART: Antiretroviral treatment; CD4: CD4 T-lymphocyte cell count per µL; dx: Diagnosis; aHR: adjusted hazard ratio; CI: confidence interval.

HET: heterosexual; MSM: men who have sex with men; PWID: people who inject drugs.

\* No prior ART utilization at study entry compared to prior ART utilization at study entry.

**Supplement Table 2A. Multivariate multi-state Markov model results of disease progression during ART, mortality and ART engagement from the northeast region study sample (n=13,563)**

| Reference                           | HET female              | MSM                     | Black                   | Hispanic/Latino         | PWID                    | No prior ART*           | Age                     | Time since dx           | log(pVL)                |
|-------------------------------------|-------------------------|-------------------------|-------------------------|-------------------------|-------------------------|-------------------------|-------------------------|-------------------------|-------------------------|
|                                     | aHR (95% CI)            | per 10 years            | per year                | per unit                |
| <b>Transitions</b>                  |                         |                         |                         |                         |                         |                         |                         |                         |                         |
| <b>CD4 improvement during ART</b>   |                         |                         |                         |                         |                         |                         |                         |                         |                         |
| <200 to 200-499                     | <b>1.37 (1.17,1.61)</b> | <b>1.45 (1.23,1.70)</b> | 1.11 (0.93,1.32)        | 1.13 (0.93,1.36)        | 0.94 (0.79,1.13)        | <b>1.25 (1.03,1.52)</b> | 1.01 (0.94,1.08)        | <b>0.99 (0.98,1.00)</b> | <b>0.95 (0.92,0.97)</b> |
| 200-499 to ≥500                     | <b>1.25 (1.12,1.40)</b> | <b>1.13 (1.02,1.25)</b> | 1.00 (0.91,1.11)        | 1.05 (0.95,1.16)        | 0.97 (0.86,1.09)        | <b>1.40 (1.26,1.57)</b> | <b>0.96 (0.93,1.00)</b> | <b>0.99 (0.99,1.00)</b> | <b>0.98 (0.96,0.99)</b> |
| <b>CD4 deterioration during ART</b> |                         |                         |                         |                         |                         |                         |                         |                         |                         |
| ≥500 to 200-499                     | <b>0.72 (0.64,0.82)</b> | <b>0.85 (0.75,0.95)</b> | <b>1.26 (1.13,1.41)</b> | <b>1.25 (1.11,1.40)</b> | <b>1.26 (1.11,1.42)</b> | <b>0.81 (0.70,0.93)</b> | 1.04 (0.99,1.08)        | <b>1.01 (1.00,1.02)</b> | <b>1.10 (1.07,1.12)</b> |
| 200-499 to <200                     | 1.16 (0.97,1.38)        | <b>0.79 (0.66,0.95)</b> | 1.20 (0.99,1.45)        | 1.08 (0.88,1.32)        | <b>1.27 (1.07,1.52)</b> | <b>0.70 (0.55,0.89)</b> | 1.00 (0.93,1.07)        | <b>1.02 (1.01,1.03)</b> | <b>1.20 (1.17,1.24)</b> |
| <b>ART dropout</b>                  |                         |                         |                         |                         |                         |                         |                         |                         |                         |
| ≥500 to off-ART                     | 0.96 (0.82,1.11)        | <b>0.61 (0.52,0.71)</b> | 1.00 (0.87,1.16)        | 1.03 (0.89,1.20)        | 1.11 (0.93,1.32)        | 0.88 (0.73,1.05)        | <b>0.83 (0.79,0.88)</b> | 1.00 (0.99,1.01)        | 1.01 (0.98,1.04)        |
| 200-499 to off-ART                  | 1.16 (0.98,1.36)        | <b>0.76 (0.64,0.90)</b> | 1.02 (0.86,1.20)        | 1.12 (0.94,1.33)        | 1.06 (0.89,1.26)        | 0.99 (0.82,1.20)        | <b>0.85 (0.81,0.91)</b> | <b>0.99 (0.98,1.00)</b> | <b>1.03 (1.00,1.06)</b> |
| <200 to off-ART                     | 0.85 (0.68,1.06)        | 1.07 (0.86,1.34)        | 1.21 (0.93,1.58)        | <b>1.33 (1.00,1.76)</b> | 1.22 (0.97,1.55)        | <b>0.70 (0.50,0.97)</b> | <b>0.91 (0.83,1.00)</b> | <b>0.99 (0.97,1.00)</b> | <b>1.04 (1.00,1.08)</b> |
| <b>ART re-initiation</b>            |                         |                         |                         |                         |                         |                         |                         |                         |                         |
| Off-ART to ≥500 on-ART              | <b>1.39 (1.19,1.61)</b> | <b>1.22 (1.04,1.44)</b> | 1.13 (0.97,1.33)        | <b>1.51 (1.29,1.78)</b> | <b>0.85 (0.72,1.00)</b> | 0.95 (0.77,1.17)        | <b>1.12 (1.06,1.19)</b> | <b>0.99 (0.98,1.00)</b> | <b>0.87 (0.85,0.89)</b> |
| Off-ART to 200-499 on-ART           | 1.05 (0.90,1.24)        | 1.01 (0.86,1.20)        | 1.13 (0.95,1.35)        | <b>1.51 (1.26,1.81)</b> | 0.91 (0.76,1.08)        | <b>0.62 (0.48,0.79)</b> | 1.03 (0.97,1.10)        | <b>0.99 (0.98,1.00)</b> | <b>1.06 (1.03,1.08)</b> |
| Off-ART to <200 on-ART              | 0.86 (0.69,1.06)        | <b>0.79 (0.63,0.98)</b> | <b>1.63 (1.25,2.12)</b> | <b>1.58 (1.19,2.09)</b> | 0.81 (0.64,1.03)        | <b>0.49 (0.35,0.68)</b> | 1.06 (0.97,1.16)        | 0.99 (0.98,1.01)        | <b>1.25 (1.21,1.30)</b> |
| <b>Mortality</b>                    |                         |                         |                         |                         |                         |                         |                         |                         |                         |
| ≥500 to death                       | 0.93 (0.52,1.65)        | <b>0.49 (0.25,0.95)</b> | 0.62 (0.36,1.07)        | <b>0.32 (0.16,0.66)</b> | <b>2.12 (1.22,3.67)</b> | 0.55 (0.21,1.45)        | <b>1.71 (1.34,2.18)</b> | 0.99 (0.95,1.02)        | 1.07 (0.94,1.21)        |
| 200-499 to death                    | 0.89 (0.55,1.44)        | 0.60 (0.36,1.01)        | 0.97 (0.59,1.58)        | 0.62 (0.36,1.09)        | <b>1.57 (1.01,2.47)</b> | 1.21 (0.65,2.28)        | <b>1.62 (1.33,1.98)</b> | 1.02 (0.99,1.05)        | 1.01 (0.92,1.11)        |
| <200 to death                       | 1.02 (0.66,1.56)        | 1.21 (0.76,1.93)        | 0.66 (0.43,1.01)        | 0.65 (0.40,1.05)        | <b>2.45 (1.66,3.62)</b> | 0.55 (0.26,1.16)        | <b>1.80 (1.47,2.20)</b> | <b>0.97 (0.95,1.00)</b> | 1.04 (0.96,1.12)        |
| Off-ART to death                    | 1.53 (0.71,3.28)        | 1.17 (0.49,2.81)        | 0.64 (0.30,1.38)        | 0.70 (0.30,1.60)        | 1.05 (0.49,2.24)        | 0.74 (0.19,2.88)        | <b>1.95 (1.45,2.61)</b> | 1.03 (0.99,1.08)        | 1.07 (0.94,1.22)        |

**Bold indicates statistically significant adjusted hazard ratios at p<0.05**

ART: Antiretroviral treatment; CD4: CD4 T-lymphocyte cell count per μL; dx: Diagnosis; aHR: adjusted hazard ratio; CI: confidence interval.

HET: heterosexual; MSM: men who have sex with men; PWID: people who inject drugs.

\* No prior ART utilization at study entry compared to prior ART utilization at study entry.

**Supplement Table 2B. Multivariate multi-state Markov model results of disease progression during ART, mortality and ART engagement from the south region study sample (n=13,345)**

| Reference                           | HET female              | MSM                     | Black                            | Hispanic/Latino         | PWID                    | No prior ART*           | Age                     | Time since dx           | log(pVL)                |
|-------------------------------------|-------------------------|-------------------------|----------------------------------|-------------------------|-------------------------|-------------------------|-------------------------|-------------------------|-------------------------|
|                                     | <i>HET male</i>         |                         | <i>non-Hispanic white/others</i> |                         | <i>non-PWID</i>         | <i>Prior ART</i>        | <i>per 10 years</i>     | <i>per year</i>         | <i>per unit</i>         |
| Transitions                         | aHR (95% CI)            | aHR (95% CI)            | aHR (95% CI)                     | aHR (95% CI)            | aHR (95% CI)            | aHR (95% CI)            | aHR (95% CI)            | aHR (95% CI)            | aHR (95% CI)            |
| <b>CD4 improvement during ART</b>   |                         |                         |                                  |                         |                         |                         |                         |                         |                         |
| <200 to 200-499                     | <b>1.38 (1.20,1.58)</b> | <b>1.15 (1.01,1.30)</b> | <b>1.26 (1.09,1.45)</b>          | <b>1.18 (1.00,1.39)</b> | 1.02 (0.87,1.20)        | <b>1.49 (1.31,1.69)</b> | 1.01 (0.96,1.07)        | 1.00 (0.99,1.01)        | <b>0.96 (0.94,0.99)</b> |
| 200-499 to ≥500                     | <b>1.45 (1.30,1.60)</b> | 1.08 (0.98,1.20)        | 1.04 (0.94,1.15)                 | <b>0.88 (0.78,1.00)</b> | 0.91 (0.80,1.04)        | <b>1.21 (1.09,1.33)</b> | <b>0.89 (0.85,0.92)</b> | <b>1.00 (0.99,1.00)</b> | <b>0.97 (0.95,0.99)</b> |
| <b>CD4 deterioration during ART</b> |                         |                         |                                  |                         |                         |                         |                         |                         |                         |
| ≥500 to 200-499                     | <b>0.66 (0.59,0.74)</b> | <b>0.85 (0.76,0.95)</b> | 1.01 (0.91,1.13)                 | <b>1.16 (1.01,1.32)</b> | <b>1.22 (1.06,1.39)</b> | 0.89 (0.78,1.02)        | 0.99 (0.95,1.04)        | 1.00 (0.99,1.01)        | <b>1.09 (1.06,1.11)</b> |
| 200-499 to <200                     | 1.14 (0.97,1.36)        | 0.87 (0.73,1.02)        | 0.96 (0.81,1.13)                 | 0.85 (0.69,1.04)        | <b>1.20 (1.00,1.45)</b> | 0.92 (0.77,1.10)        | 0.98 (0.92,1.05)        | <b>1.03 (1.02,1.04)</b> | <b>1.19 (1.16,1.23)</b> |
| <b>ART dropout</b>                  |                         |                         |                                  |                         |                         |                         |                         |                         |                         |
| ≥500 to off-ART                     | 1.06 (0.96,1.18)        | 0.99 (0.89,1.10)        | 0.95 (0.87,1.05)                 | <b>0.57 (0.49,0.65)</b> | <b>1.44 (1.29,1.61)</b> | <b>1.12 (1.00,1.26)</b> | <b>0.93 (0.90,0.97)</b> | <b>1.02 (1.01,1.02)</b> | <b>0.97 (0.95,0.99)</b> |
| 200-499 to off-ART                  | 1.09 (0.98,1.21)        | <b>0.90 (0.81,1.00)</b> | <b>1.14 (1.02,1.26)</b>          | <b>0.80 (0.70,0.91)</b> | <b>1.68 (1.51,1.88)</b> | <b>0.89 (0.80,1.00)</b> | <b>0.84 (0.80,0.87)</b> | <b>1.01 (1.00,1.02)</b> | <b>1.02 (1.00,1.04)</b> |
| <200 to off-ART                     | 1.11 (0.95,1.29)        | 0.90 (0.77,1.04)        | <b>1.30 (1.11,1.53)</b>          | <b>0.77 (0.62,0.95)</b> | <b>1.50 (1.28,1.76)</b> | <b>0.69 (0.59,0.82)</b> | <b>0.90 (0.84,0.96)</b> | 1.00 (0.99,1.01)        | <b>1.02 (1.00,1.05)</b> |
| <b>ART re-initiation</b>            |                         |                         |                                  |                         |                         |                         |                         |                         |                         |
| Off-ART to ≥500 on-ART              | <b>1.36 (1.20,1.53)</b> | <b>1.35 (1.19,1.53)</b> | 0.99 (0.89,1.11)                 | 1.04 (0.89,1.22)        | 0.89 (0.78,1.01)        | <b>1.34 (1.18,1.53)</b> | <b>1.09 (1.04,1.15)</b> | 1.01 (1.00,1.01)        | <b>0.84 (0.82,0.86)</b> |
| Off-ART to 200-499 on-ART           | 1.03 (0.91,1.15)        | 1.05 (0.93,1.18)        | <b>1.16 (1.03,1.31)</b>          | <b>1.34 (1.15,1.56)</b> | 1.07 (0.95,1.20)        | 1.05 (0.92,1.19)        | <b>1.06 (1.01,1.11)</b> | <b>1.00 (0.99,1.00)</b> | <b>1.02 (1.00,1.04)</b> |
| Off-ART to <200 on-ART              | <b>0.82 (0.71,0.93)</b> | <b>0.84 (0.74,0.96)</b> | <b>1.33 (1.16,1.54)</b>          | <b>1.56 (1.30,1.87)</b> | 0.97 (0.84,1.12)        | <b>0.68 (0.58,0.79)</b> | 1.02 (0.96,1.08)        | 1.00 (0.99,1.01)        | <b>1.23 (1.20,1.26)</b> |
| <b>Mortality</b>                    |                         |                         |                                  |                         |                         |                         |                         |                         |                         |
| ≥500 to death                       | 0.66 (0.35,1.24)        | 1.26 (0.70,2.29)        | 1.18 (0.66,2.09)                 | 0.77 (0.34,1.74)        | 1.61 (0.89,2.90)        | 0.89 (0.38,2.09)        | <b>1.46 (1.15,1.87)</b> | <b>1.04 (1.00,1.08)</b> | 1.04 (0.90,1.19)        |
| 200-499 to death                    | 0.99 (0.60,1.61)        | 1.20 (0.76,1.91)        | 1.18 (0.73,1.91)                 | 0.65 (0.33,1.27)        | <b>1.85 (1.21,2.84)</b> | 0.78 (0.43,1.42)        | <b>2.24 (1.83,2.73)</b> | 0.99 (0.96,1.02)        | 1.07 (0.98,1.16)        |
| <200 to death                       | 1.26 (0.92,1.72)        | 1.17 (0.87,1.57)        | 0.85 (0.64,1.13)                 | <b>0.55 (0.36,0.82)</b> | <b>1.69 (1.26,2.27)</b> | 0.99 (0.72,1.36)        | <b>1.30 (1.15,1.48)</b> | 0.99 (0.97,1.01)        | <b>1.07 (1.02,1.13)</b> |
| Off-ART to death                    | 0.98 (0.45,2.12)        | 1.39 (0.67,2.86)        | 0.81 (0.41,1.59)                 | 0.92 (0.35,2.40)        | 1.33 (0.68,2.62)        | 0.96 (0.40,2.29)        | <b>2.05 (1.54,2.74)</b> | 0.99 (0.95,1.04)        | <b>1.21 (1.07,1.37)</b> |

**Bold indicates statistically significant adjusted hazard ratios at p<0.05**

ART: Antiretroviral treatment; CD4: CD4 T-lymphocyte cell count per μL; dx: Diagnosis; aHR: adjusted hazard ratio; CI: confidence interval.

HET: heterosexual; MSM: men who have sex with men; PWID: people who inject drugs.

\* No prior ART utilization at study entry compared to prior ART utilization at study entry.

**Supplement Table 2C. Multivariate multi-state Markov model results of disease progression during ART, mortality and ART engagement from the west region study sample (n=5,334)**

| Reference                    | HET female              | MSM                     | Black                            | Hispanic/Latino         | PWID                    | No prior ART*           | Age                     | Time since dx           | log(pVL)                |
|------------------------------|-------------------------|-------------------------|----------------------------------|-------------------------|-------------------------|-------------------------|-------------------------|-------------------------|-------------------------|
|                              | <i>HET male</i>         |                         | <i>non-Hispanic white/others</i> |                         | <i>non-PWID</i>         | <i>Prior ART</i>        | <i>per 10 years</i>     | <i>per year</i>         | <i>per unit</i>         |
| Transitions                  | aHR (95% CI)            | aHR (95% CI)            | aHR (95% CI)                     | aHR (95% CI)            | aHR (95% CI)            | aHR (95% CI)            | aHR (95% CI)            | aHR (95% CI)            | aHR (95% CI)            |
| CD4 improvement during ART   |                         |                         |                                  |                         |                         |                         |                         |                         |                         |
| <200 to 200-499              | 1.27 (0.93,1.74)        | <b>1.26 (1.01,1.58)</b> | <b>0.68 (0.53,0.87)</b>          | 0.94 (0.76,1.16)        | 1.05 (0.81,1.36)        | <b>1.34 (1.07,1.67)</b> | <b>1.12 (1.02,1.24)</b> | <b>0.98 (0.97,0.99)</b> | 0.99 (0.95,1.02)        |
| 200-499 to ≥500              | <b>1.34 (1.07,1.67)</b> | 1.10 (0.92,1.31)        | 0.88 (0.75,1.05)                 | <b>0.80 (0.69,0.94)</b> | 0.99 (0.81,1.19)        | <b>1.37 (1.14,1.63)</b> | <b>0.89 (0.83,0.95)</b> | <b>0.99 (0.98,1.00)</b> | 0.98 (0.95,1.01)        |
| CD4 deterioration during ART |                         |                         |                                  |                         |                         |                         |                         |                         |                         |
| ≥500 to off-ART              | 0.85 (0.67,1.07)        | 0.89 (0.74,1.08)        | 1.12 (0.93,1.34)                 | 1.03 (0.87,1.21)        | 1.20 (0.99,1.45)        | 0.84 (0.68,1.05)        | <b>1.09 (1.02,1.17)</b> | <b>1.01 (1.00,1.02)</b> | <b>1.05 (1.01,1.09)</b> |
| 200-499 to <200              | 0.84 (0.58,1.22)        | <b>0.79 (0.60,1.04)</b> | 1.21 (0.92,1.60)                 | 1.13 (0.87,1.47)        | 1.22 (0.92,1.63)        | 0.94 (0.68,1.31)        | 1.09 (0.97,1.23)        | <b>1.02 (1.00,1.03)</b> | <b>1.14 (1.09,1.20)</b> |
| ART dropout                  |                         |                         |                                  |                         |                         |                         |                         |                         |                         |
| ≥500 to off-ART              | 1.02 (0.77,1.35)        | 1.17 (0.94,1.47)        | 0.95 (0.78,1.15)                 | <b>0.61 (0.50,0.74)</b> | <b>1.24 (1.00,1.53)</b> | <b>1.48 (1.20,1.82)</b> | <b>0.76 (0.71,0.83)</b> | 1.00 (0.99,1.02)        | <b>0.96 (0.92,1.00)</b> |
| 200-499 to off-ART           | 1.19 (0.90,1.58)        | 1.05 (0.84,1.31)        | 1.12 (0.91,1.38)                 | 0.84 (0.69,1.02)        | 1.22 (0.97,1.53)        | 1.14 (0.90,1.45)        | <b>0.72 (0.66,0.78)</b> | <b>1.01 (1.00,1.02)</b> | <b>0.96 (0.92,1.00)</b> |
| <200 to off-ART              | 0.81 (0.53,1.24)        | 0.86 (0.64,1.15)        | 1.08 (0.80,1.45)                 | 0.73 (0.52,1.02)        | <b>1.48 (1.08,2.01)</b> | 1.03 (0.74,1.43)        | <b>0.81 (0.69,0.93)</b> | 1.01 (0.99,1.03)        | 1.04 (0.99,1.10)        |
| ART re-initiation            |                         |                         |                                  |                         |                         |                         |                         |                         |                         |
| Off-ART to ≥500 on-ART       | <b>1.69 (1.16,2.45)</b> | 1.20 (0.86,1.67)        | 0.98 (0.75,1.29)                 | 0.90 (0.68,1.17)        | 0.79 (0.58,1.08)        | <b>0.74 (0.54,1.00)</b> | 0.95 (0.85,1.06)        | 0.99 (0.98,1.01)        | <b>0.93 (0.88,0.97)</b> |
| Off-ART to 200-499 on-ART    | 0.87 (0.59,1.27)        | 0.95 (0.70,1.27)        | <b>1.39 (1.07,1.81)</b>          | 1.05 (0.78,1.40)        | 1.14 (0.86,1.51)        | <b>0.51 (0.36,0.73)</b> | 1.01 (0.89,1.14)        | 1.00 (0.99,1.02)        | <b>1.09 (1.04,1.13)</b> |
| Off-ART to <200 on-ART       | 0.66 (0.43,1.02)        | <b>0.68 (0.49,0.94)</b> | 1.21 (0.87,1.67)                 | <b>1.65 (1.23,2.23)</b> | 1.18 (0.86,1.63)        | <b>0.33 (0.21,0.51)</b> | 1.04 (0.90,1.19)        | 1.00 (0.98,1.02)        | <b>1.26 (1.20,1.32)</b> |
| Mortality                    |                         |                         |                                  |                         |                         |                         |                         |                         |                         |
| ≥500 to death                | 0.76 (0.20,2.89)        | 1.04 (0.36,2.96)        | 1.36 (0.53,3.44)                 | 1.11 (0.41,2.99)        | <b>3.52 (1.55,7.99)</b> | 2.17 (0.75,6.29)        | <b>1.63 (1.09,2.45)</b> | 1.01 (0.95,1.06)        | 0.79 (0.60,1.03)        |
| 200-499 to death             | 1.09 (0.51,2.31)        | <b>0.38 (0.20,0.72)</b> | <b>0.20 (0.07,0.58)</b>          | <b>0.50 (0.25,1.00)</b> | 1.28 (0.69,2.39)        | 0.54 (0.15,1.93)        | <b>1.48 (1.11,1.98)</b> | <b>1.07 (1.03,1.10)</b> | 1.00 (0.89,1.14)        |
| <200 to death                | 0.81 (0.36,1.86)        | 1.13 (0.65,1.99)        | 1.46 (0.85,2.50)                 | 1.50 (0.85,2.66)        | 0.93 (0.50,1.73)        | 1.08 (0.60,1.96)        | <b>2.09 (1.61,2.70)</b> | 1.02 (0.99,1.06)        | <b>1.19 (1.08,1.30)</b> |
| Off-ART to death             | 0.98 (0.18,5.17)        | 0.23 (0.04,1.45)        | 0.42 (0.06,2.84)                 | 0.62 (0.07,5.26)        | 2.57 (0.57,11.71)       | 0.56 (0.06,5.15)        | <b>2.47 (1.15,5.35)</b> | 1.02 (0.92,1.12)        | 1.31 (0.98,1.75)        |

**Bold indicates statistically significant adjusted hazard ratios at p<0.05**

ART: Antiretroviral treatment; CD4: CD4 T-lymphocyte cell count per µL; dx: Diagnosis; aHR: adjusted hazard ratio; CI: confidence interval.

HET: heterosexual; MSM: men who have sex with men; PWID: people who inject drugs.

\* No prior ART utilization at study entry compared to prior ART utilization at study entry.

## RESULTS FROM ADDITIONAL SENSITIVITY ANALYSIS

Results presented here (pages 8-9) are from additional sensitivity analysis with worst- and best-case imputation scenarios in which missing covariates were replaced with values associated with worst and best disease progression outcomes, a statistical approach that has been recommended for its simplicity in assessing potential bias from missing data [1].

**Supplement Table 3a. Multivariate multi-state Markov model results of disease progression during ART, mortality and ART engagement from the full eligible sample (N=38,472; best-case imputation scenario<sup>^</sup>)**

| Reference                    | HET female              | MSM                     | Black                            | Hispanic/Latino         | PWID                    | No prior ART*           | Age                     | Time since dx           | log(pVL)                | South                   | West                    |
|------------------------------|-------------------------|-------------------------|----------------------------------|-------------------------|-------------------------|-------------------------|-------------------------|-------------------------|-------------------------|-------------------------|-------------------------|
|                              | <i>HET male</i>         |                         | <i>non-Hispanic white/others</i> |                         | <i>non-PWID</i>         | <i>Prior ART</i>        | <i>per 10 years</i>     | <i>per year</i>         | <i>per unit</i>         | <i>Northeast</i>        |                         |
| Transitions                  | aHR (95% CI)            | aHR (95% CI)            | aHR (95% CI)                     | aHR (95% CI)            | aHR (95% CI)            | aHR (95% CI)            | aHR (95% CI)            | aHR (95% CI)            | aHR (95% CI)            | aHR (95% CI)            | aHR (95% CI)            |
| CD4 improvement during ART   |                         |                         |                                  |                         |                         |                         |                         |                         |                         |                         |                         |
| <200 to 200-499              | <b>1.36 (1.24,1.49)</b> | <b>1.24 (1.14,1.36)</b> | 1.07 (0.98,1.17)                 | 1.06 (0.96,1.18)        | 0.98 (0.89,1.09)        | <b>1.39 (1.27,1.52)</b> | 1.02 (0.99,1.06)        | <b>0.99 (0.98,1.00)</b> | <b>0.96 (0.95,0.98)</b> | <b>1.18 (1.08,1.27)</b> | 1.06 (0.95,1.18)        |
| 200-499 to ≥500              | <b>1.32 (1.23,1.42)</b> | <b>1.11 (1.04,1.19)</b> | 1.00 (0.94,1.06)                 | <b>0.93 (0.87,0.99)</b> | 0.98 (0.91,1.06)        | <b>1.31 (1.23,1.40)</b> | <b>0.92 (0.90,0.94)</b> | <b>0.99 (0.99,1.00)</b> | <b>0.97 (0.96,0.99)</b> | <b>0.86 (0.82,0.91)</b> | <b>0.85 (0.79,0.92)</b> |
| CD4 deterioration during ART |                         |                         |                                  |                         |                         |                         |                         |                         |                         |                         |                         |
| ≥500 to 200-499              | <b>0.73 (0.68,0.79)</b> | <b>0.84 (0.78,0.90)</b> | <b>1.13 (1.05,1.21)</b>          | <b>1.19 (1.11,1.29)</b> | <b>1.24 (1.14,1.34)</b> | <b>0.88 (0.81,0.96)</b> | <b>1.02 (1.00,1.05)</b> | <b>1.01 (1.00,1.01)</b> | <b>1.08 (1.06,1.09)</b> | <b>1.18 (1.11,1.25)</b> | <b>1.19 (1.10,1.28)</b> |
| 200-499 to <200              | <b>1.12 (1.00,1.25)</b> | <b>0.82 (0.73,0.91)</b> | <b>1.13 (1.01,1.26)</b>          | 1.01 (0.90,1.15)        | <b>1.22 (1.09,1.37)</b> | <b>0.85 (0.75,0.96)</b> | 1.00 (0.96,1.05)        | <b>1.02 (1.02,1.03)</b> | <b>1.17 (1.15,1.20)</b> | 0.98 (0.89,1.07)        | 1.04 (0.91,1.18)        |
| ART dropout                  |                         |                         |                                  |                         |                         |                         |                         |                         |                         |                         |                         |
| ≥500 to off-ART              | 1.05 (0.97,1.14)        | <b>0.88 (0.81,0.95)</b> | 0.97 (0.90,1.04)                 | <b>0.74 (0.68,0.80)</b> | <b>1.35 (1.24,1.47)</b> | 1.11 (1.02,1.21)        | <b>0.89 (0.87,0.92)</b> | <b>1.01 (1.00,1.01)</b> | <b>0.98 (0.96,0.99)</b> | <b>2.37 (2.22,2.53)</b> | <b>1.64 (1.50,1.79)</b> |
| 200-499 to off-ART           | <b>1.17 (1.08,1.27)</b> | <b>0.88 (0.82,0.96)</b> | <b>1.12 (1.03,1.21)</b>          | <b>0.91 (0.83,0.99)</b> | <b>1.45 (1.34,1.58)</b> | 0.96 (0.89,1.05)        | <b>0.84 (0.81,0.86)</b> | <b>1.00 (1.00,1.01)</b> | 1.00 (0.99,1.02)        | <b>1.89 (1.76,2.03)</b> | <b>1.37 (1.24,1.51)</b> |
| <200 to off-ART              | 1.04 (0.93,1.17)        | 0.91 (0.81,1.01)        | <b>1.24 (1.11,1.40)</b>          | 0.93 (0.81,1.07)        | <b>1.36 (1.21,1.53)</b> | <b>0.75 (0.66,0.85)</b> | <b>0.90 (0.86,0.94)</b> | 1.00 (0.99,1.01)        | <b>1.01 (0.99,1.03)</b> | <b>1.84 (1.65,2.04)</b> | <b>1.22 (1.05,1.43)</b> |
| ART re-initiation            |                         |                         |                                  |                         |                         |                         |                         |                         |                         |                         |                         |
| Off-ART to ≥500 on-ART       | <b>1.36 (1.25,1.49)</b> | <b>1.29 (1.18,1.41)</b> | 0.96 (0.89,1.04)                 | <b>1.14 (1.04,1.25)</b> | <b>0.86 (0.79,0.94)</b> | 1.08 (0.99,1.19)        | <b>1.10 (1.07,1.13)</b> | <b>1.00 (0.99,1.00)</b> | <b>0.90 (0.89,0.91)</b> | <b>1.28 (1.20,1.37)</b> | <b>0.50 (0.45,0.56)</b> |
| Off-ART to 200-499 on-ART    | 1.01 (0.93,1.10)        | 1.05 (0.96,1.14)        | <b>1.12 (1.03,1.22)</b>          | <b>1.34 (1.21,1.47)</b> | 1.02 (0.94,1.12)        | <b>0.92 (0.83,1.01)</b> | <b>1.05 (1.01,1.08)</b> | <b>1.00 (0.99,1.00)</b> | <b>1.03 (1.01,1.04)</b> | <b>1.39 (1.29,1.50)</b> | <b>0.58 (0.52,0.65)</b> |
| Off-ART to <200 on-ART       | <b>0.81 (0.73,0.89)</b> | <b>0.77 (0.69,0.85)</b> | <b>1.41 (1.27,1.58)</b>          | <b>1.54 (1.36,1.75)</b> | 0.91 (0.82,1.02)        | <b>0.64 (0.57,0.72)</b> | 1.00 (0.96,1.04)        | <b>1.01 (1.00,1.01)</b> | <b>1.18 (1.16,1.19)</b> | <b>1.72 (1.56,1.89)</b> | 0.93 (0.80,1.07)        |
| Mortality                    |                         |                         |                                  |                         |                         |                         |                         |                         |                         |                         |                         |
| ≥500 to death                | 0.83 (0.56,1.23)        | 0.79 (0.53,1.19)        | 0.79 (0.56,1.13)                 | <b>0.48 (0.30,0.78)</b> | <b>2.34 (1.65,3.32)</b> | 0.70 (0.39,1.24)        | <b>1.59 (1.36,1.85)</b> | 1.01 (0.99,1.03)        | 1.06 (0.98,1.15)        | 1.31 (0.94,1.82)        | 1.10 (0.71,1.68)        |
| 200-499 to death             | 1.05 (0.79,1.41)        | <b>0.69 (0.51,0.93)</b> | 0.77 (0.59,1.02)                 | <b>0.53 (0.38,0.75)</b> | <b>1.60 (1.22,2.09)</b> | 0.84 (0.57,1.25)        | <b>1.89 (1.67,2.12)</b> | <b>1.01 (1.00,1.03)</b> | 1.04 (0.98,1.09)        | 1.10 (0.85,1.42)        | 1.21 (0.89,1.65)        |
| <200 to death                | 1.14 (0.91,1.44)        | 1.12 (0.90,1.39)        | 0.88 (0.71,1.09)                 | <b>0.72 (0.56,0.93)</b> | <b>1.56 (1.26,1.92)</b> | 0.93 (0.72,1.19)        | <b>1.51 (1.38,1.66)</b> | 0.99 (0.98,1.00)        | <b>1.07 (1.03,1.11)</b> | <b>1.83 (1.49,2.25)</b> | <b>1.41 (1.07,1.86)</b> |
| Off-ART to death             | 1.46 (0.91,2.34)        | 1.18 (0.70,2.00)        | 0.71 (0.45,1.11)                 | 0.81 (0.46,1.40)        | 1.41 (0.91,2.18)        | 0.79 (0.43,1.45)        | <b>1.95 (1.62,2.35)</b> | 1.00 (0.97,1.02)        | <b>1.15 (1.08,1.24)</b> | 1.16 (0.78,1.72)        | <b>0.37 (0.18,0.75)</b> |

**Bold indicates statistically significant adjusted hazard ratios at p<0.05**

ART: Antiretroviral treatment; CD4: CD4 T-lymphocyte cell count per  $\mu\text{L}$ ; dx: Diagnosis; aHR: adjusted hazard ratio; CI: confidence interval.

HET: heterosexual; MSM: men who have sex with men; PWID: people who inject drugs.

\* No prior ART utilization at study entry compared to prior ART utilization at study entry.

<sup>^</sup> Best-case missing covariate imputation scenario: race/ethnicity = non-Hispanic white/others; HIV risk group = HET female or MSM; No prior ART = 1; Time since dx = 0; log(pVL) = sample minimum.

1. Pedersen AB, Mikkelsen EM, Cronin-Fenton D, Kristensen NR, Pham TM, Pedersen L, Petersen I. Missing data and multiple imputation in clinical epidemiological research. *Clinical epidemiology*. 2017;9:157

**Supplement Table 3b. Multivariate multi-state Markov model results of disease progression during ART, mortality and ART engagement from the full eligible sample (N=38,472; worst-case imputation scenario<sup>^</sup>)**

| Transitions                  | HET female              |                         | MSM                     | Black                     | Hispanic/Latino         | PWID                    | No prior ART*           | Age                     | Time since dx           | log(pVL)                | South                   | West         |
|------------------------------|-------------------------|-------------------------|-------------------------|---------------------------|-------------------------|-------------------------|-------------------------|-------------------------|-------------------------|-------------------------|-------------------------|--------------|
|                              | Reference               | HET male                |                         | non-Hispanic white/others |                         | non-PWID                | Prior ART               | per 10 years            | per year                | per unit                | Northeast               |              |
|                              | aHR (95% CI)            | aHR (95% CI)            | aHR (95% CI)            | aHR (95% CI)              | aHR (95% CI)            | aHR (95% CI)            | aHR (95% CI)            | aHR (95% CI)            | aHR (95% CI)            | aHR (95% CI)            | aHR (95% CI)            | aHR (95% CI) |
| CD4 improvement during ART   |                         |                         |                         |                           |                         |                         |                         |                         |                         |                         |                         |              |
| <200 to 200-499              | <b>1.37 (1.24,1.50)</b> | <b>1.23 (1.13,1.34)</b> | 1.06 (0.97,1.17)        | 1.06 (0.96,1.17)          | 0.97 (0.88,1.07)        | <b>1.39 (1.27,1.52)</b> | 1.03 (0.99,1.06)        | <b>0.99 (0.99,1.00)</b> | <b>0.98 (0.97,0.99)</b> | <b>1.16 (1.07,1.26)</b> | 1.06 (0.96,1.19)        |              |
| 200-499 to ≥500              | <b>1.35 (1.26,1.44)</b> | <b>1.09 (1.03,1.17)</b> | 0.99 (0.93,1.05)        | <b>0.93 (0.87,0.99)</b>   | 0.95 (0.88,1.02)        | <b>1.27 (1.19,1.35)</b> | <b>0.92 (0.90,0.94)</b> | <b>0.99 (0.99,1.00)</b> | <b>0.99 (0.98,1.00)</b> | <b>0.85 (0.80,0.89)</b> | <b>0.85 (0.79,0.91)</b> |              |
| CD4 deterioration during ART |                         |                         |                         |                           |                         |                         |                         |                         |                         |                         |                         |              |
| ≥500 to 200-499              | <b>0.72 (0.67,0.78)</b> | <b>0.84 (0.78,0.90)</b> | <b>1.14 (1.06,1.22)</b> | <b>1.19 (1.10,1.28)</b>   | <b>1.28 (1.18,1.38)</b> | 0.98 (0.90,1.06)        | <b>1.02 (1.00,1.05)</b> | <b>1.01 (1.00,1.01)</b> | <b>1.04 (1.03,1.05)</b> | <b>1.25 (1.18,1.33)</b> | <b>1.21 (1.12,1.31)</b> |              |
| 200-499 to <200              | <b>1.14 (1.02,1.28)</b> | <b>0.82 (0.74,0.92)</b> | <b>1.16 (1.04,1.30)</b> | 0.99 (0.88,1.12)          | <b>1.25 (1.12,1.40)</b> | 0.95 (0.85,1.08)        | 0.99 (0.95,1.04)        | <b>1.02 (1.01,1.02)</b> | <b>1.11 (1.09,1.12)</b> | 1.06 (0.97,1.17)        | 1.09 (0.96,1.23)        |              |
| ART dropout                  |                         |                         |                         |                           |                         |                         |                         |                         |                         |                         |                         |              |
| ≥500 to off-ART              | 1.04 (0.96,1.13)        | <b>0.89 (0.83,0.97)</b> | 0.98 (0.91,1.05)        | <b>0.74 (0.68,0.81)</b>   | <b>1.36 (1.25,1.47)</b> | 1.03 (0.95,1.12)        | <b>0.90 (0.87,0.92)</b> | <b>1.01 (1.00,1.01)</b> | <b>1.01 (1.00,1.02)</b> | <b>2.34 (2.19,2.50)</b> | <b>1.64 (1.50,1.79)</b> |              |
| 200-499 to off-ART           | <b>1.15 (1.06,1.24)</b> | <b>0.90 (0.83,0.97)</b> | <b>1.12 (1.04,1.22)</b> | <b>0.92 (0.84,1.00)</b>   | <b>1.47 (1.36,1.59)</b> | 0.93 (0.86,1.01)        | <b>0.84 (0.81,0.86)</b> | <b>1.01 (1.00,1.01)</b> | <b>1.02 (1.01,1.03)</b> | <b>1.91 (1.78,2.05)</b> | <b>1.38 (1.25,1.52)</b> |              |
| <200 to off-ART              | 1.02 (0.91,1.14)        | 0.92 (0.82,1.02)        | <b>1.27 (1.13,1.43)</b> | 0.95 (0.83,1.10)          | <b>1.40 (1.25,1.57)</b> | <b>0.74 (0.65,0.84)</b> | <b>0.90 (0.86,0.94)</b> | 1.00 (0.99,1.01)        | <b>1.03 (1.01,1.05)</b> | <b>1.87 (1.68,2.07)</b> | <b>1.24 (1.07,1.45)</b> |              |
| ART re-initiation            |                         |                         |                         |                           |                         |                         |                         |                         |                         |                         |                         |              |
| Off-ART to ≥500 on-ART       | <b>1.38 (1.26,1.50)</b> | <b>1.29 (1.19,1.41)</b> | 0.94 (0.87,1.01)        | <b>1.13 (1.03,1.23)</b>   | <b>0.85 (0.78,0.92)</b> | 0.97 (0.88,1.07)        | <b>1.11 (1.08,1.15)</b> | <b>1.00 (0.99,1.00)</b> | <b>0.95 (0.94,0.96)</b> | <b>1.12 (1.04,1.20)</b> | <b>0.50 (0.45,0.56)</b> |              |
| Off-ART to 200-499 on-ART    | 1.00 (0.92,1.09)        | 1.05 (0.97,1.14)        | <b>1.13 (1.04,1.23)</b> | <b>1.34 (1.21,1.47)</b>   | 1.04 (0.96,1.13)        | <b>0.87 (0.79,0.96)</b> | <b>1.04 (1.01,1.07)</b> | <b>1.00 (0.99,1.00)</b> | <b>1.02 (1.01,1.03)</b> | <b>1.44 (1.34,1.55)</b> | <b>0.58 (0.52,0.65)</b> |              |
| Off-ART to <200 on-ART       | <b>0.80 (0.72,0.89)</b> | <b>0.78 (0.70,0.86)</b> | <b>1.43 (1.28,1.60)</b> | <b>1.54 (1.36,1.75)</b>   | 0.96 (0.86,1.06)        | <b>0.76 (0.67,0.86)</b> | 0.99 (0.95,1.03)        | <b>1.00 (0.99,1.00)</b> | <b>1.09 (1.08,1.10)</b> | <b>2.15 (1.95,2.36)</b> | 0.91 (0.79,1.05)        |              |
| Mortality                    |                         |                         |                         |                           |                         |                         |                         |                         |                         |                         |                         |              |
| ≥500 to death                | 0.82 (0.55,1.23)        | 0.78 (0.52,1.17)        | 0.82 (0.57,1.18)        | <b>0.49 (0.30,0.79)</b>   | <b>2.37 (1.69,3.33)</b> | 0.80 (0.46,1.37)        | <b>1.59 (1.36,1.86)</b> | 1.00 (0.98,1.02)        | 1.00 (0.94,1.07)        | 1.33 (0.95,1.85)        | 1.11 (0.72,1.70)        |              |
| 200-499 to death             | 1.00 (0.74,1.34)        | <b>0.67 (0.50,0.90)</b> | 0.83 (0.63,1.10)        | <b>0.55 (0.39,0.77)</b>   | <b>1.57 (1.21,2.03)</b> | 0.97 (0.66,1.42)        | <b>1.80 (1.60,2.03)</b> | <b>1.03 (1.01,1.04)</b> | 1.01 (0.97,1.05)        | 1.17 (0.91,1.52)        | 1.29 (0.95,1.76)        |              |
| <200 to death                | 1.09 (0.86,1.38)        | 1.16 (0.94,1.43)        | 0.93 (0.75,1.15)        | <b>0.77 (0.59,1.00)</b>   | <b>1.62 (1.32,1.97)</b> | 1.00 (0.78,1.28)        | <b>1.50 (1.36,1.64)</b> | 1.00 (0.99,1.02)        | <b>1.07 (1.03,1.10)</b> | <b>1.93 (1.57,2.38)</b> | <b>1.41 (1.07,1.85)</b> |              |
| Off-ART to death             | 1.33 (0.81,2.17)        | 1.26 (0.76,2.09)        | 0.74 (0.47,1.17)        | 0.82 (0.47,1.43)          | <b>1.62 (1.07,2.45)</b> | 1.04 (0.55,1.98)        | <b>1.79 (1.48,2.17)</b> | 1.01 (0.98,1.03)        | 1.00 (0.95,1.05)        | 1.37 (0.91,2.06)        | <b>0.34 (0.16,0.70)</b> |              |

**Bold indicates statistically significant adjusted hazard ratios at p<0.05**

ART: Antiretroviral treatment; CD4: CD4 T-lymphocyte cell count per µL; dx: Diagnosis; aHR: adjusted hazard ratio; CI: confidence interval.

HET: heterosexual; MSM: men who have sex with men; PWID: people who inject drugs.

\* No prior ART utilization at study entry compared to prior ART utilization at study entry.

<sup>^</sup>Worst-case missing covariate imputation scenario: race/ethnicity = Black; HIV risk group = PWID or MSMPWID ; No prior ART = 0; Time since dx = sample maximum; log(pVL) = sample maximum.

**ART dropout rate (CD4 ≥500)**

| Region    | Gender | Ethnicity | Risk | Pt. Estimate | Lower   | Upper   |
|-----------|--------|-----------|------|--------------|---------|---------|
| South     | Male   | White     | PWID | 0.01912      | 0.01669 | 0.02187 |
| South     | Male   | White     | MSM  | 0.01316      | 0.01215 | 0.01437 |
| South     | Male   | White     | MWID | 0.01889      | 0.01664 | 0.02142 |
| South     | Male   | White     | HET  | 0.01332      | 0.01188 | 0.01495 |
| South     | Male   | Black     | PWID | 0.01823      | 0.01621 | 0.02056 |
| South     | Male   | Black     | MSM  | 0.01254      | 0.01156 | 0.01354 |
| South     | Male   | Black     | MWID | 0.01801      | 0.01589 | 0.02028 |
| South     | Male   | Black     | HET  | 0.01269      | 0.01164 | 0.01391 |
| South     | Male   | Hispanic  | PWID | 0.01088      | 0.00925 | 0.01267 |
| South     | Male   | Hispanic  | MSM  | 0.00746      | 0.00660 | 0.00843 |
| South     | Male   | Hispanic  | MWID | 0.01073      | 0.00908 | 0.01258 |
| South     | Male   | Hispanic  | HET  | 0.00755      | 0.00661 | 0.00869 |
| South     | Female | White     | PWID | 0.01912      | 0.01653 | 0.02171 |
| South     | Female | White     | HET  | 0.01332      | 0.01189 | 0.01505 |
| South     | Female | Black     | PWID | 0.01823      | 0.01639 | 0.02033 |
| South     | Female | Black     | HET  | 0.01269      | 0.01164 | 0.01386 |
| South     | Female | Hispanic  | PWID | 0.01088      | 0.00939 | 0.01280 |
| South     | Female | Hispanic  | HET  | 0.00755      | 0.00661 | 0.00856 |
| Northeast | Male   | White     | PWID | 0.00725      | 0.00603 | 0.00885 |
| Northeast | Male   | White     | MSM  | 0.00398      | 0.00357 | 0.00443 |
| Northeast | Male   | White     | MWID | 0.00442      | 0.00364 | 0.00538 |
| Northeast | Male   | White     | HET  | 0.00654      | 0.00547 | 0.00780 |
| Northeast | Male   | Black     | PWID | 0.00725      | 0.00611 | 0.00870 |
| Northeast | Male   | Black     | MSM  | 0.00398      | 0.00354 | 0.00450 |
| Northeast | Male   | Black     | MWID | 0.00442      | 0.00367 | 0.00545 |
| Northeast | Male   | Black     | HET  | 0.00654      | 0.00572 | 0.00750 |
| Northeast | Male   | Hispanic  | PWID | 0.00744      | 0.00619 | 0.00891 |
| Northeast | Male   | Hispanic  | MSM  | 0.00408      | 0.00362 | 0.00462 |
| Northeast | Male   | Hispanic  | MWID | 0.00453      | 0.00363 | 0.00551 |
| Northeast | Male   | Hispanic  | HET  | 0.00670      | 0.00582 | 0.00774 |
| Northeast | Female | White     | PWID | 0.00725      | 0.00602 | 0.00888 |
| Northeast | Female | White     | HET  | 0.00654      | 0.00550 | 0.00780 |
| Northeast | Female | Black     | PWID | 0.00725      | 0.00606 | 0.00870 |
| Northeast | Female | Black     | HET  | 0.00654      | 0.00572 | 0.00756 |
| Northeast | Female | Hispanic  | PWID | 0.00744      | 0.00620 | 0.00893 |
| Northeast | Female | Hispanic  | HET  | 0.00670      | 0.00578 | 0.00776 |
| West      | Male   | White     | PWID | 0.00970      | 0.00740 | 0.01266 |
| West      | Male   | White     | MSM  | 0.00920      | 0.00834 | 0.01016 |
| West      | Male   | White     | MWID | 0.01138      | 0.00940 | 0.01401 |
| West      | Male   | White     | HET  | 0.00784      | 0.00628 | 0.00975 |
| West      | Male   | Black     | PWID | 0.00919      | 0.00698 | 0.01235 |
| West      | Male   | Black     | MSM  | 0.00871      | 0.00724 | 0.01047 |
| West      | Male   | Black     | MWID | 0.01078      | 0.00825 | 0.01412 |
| West      | Male   | Black     | HET  | 0.00743      | 0.00578 | 0.00953 |
| West      | Male   | Hispanic  | PWID | 0.00595      | 0.00440 | 0.00795 |
| West      | Male   | Hispanic  | MSM  | 0.00564      | 0.00472 | 0.00674 |
| West      | Male   | Hispanic  | MWID | 0.00698      | 0.00536 | 0.00898 |
| West      | Male   | Hispanic  | HET  | 0.00481      | 0.00370 | 0.00615 |
| West      | Female | White     | PWID | 0.00970      | 0.00754 | 0.01241 |
| West      | Female | White     | HET  | 0.00784      | 0.00625 | 0.00989 |
| West      | Female | Black     | PWID | 0.00919      | 0.00693 | 0.01218 |
| West      | Female | Black     | HET  | 0.00743      | 0.00573 | 0.00966 |
| West      | Female | Hispanic  | PWID | 0.00595      | 0.00442 | 0.00802 |
| West      | Female | Hispanic  | HET  | 0.00481      | 0.00372 | 0.00621 |

**ART dropout rate (CD4 200-499)**

| Region    | Gender | Ethnicity | Risk | Pt. Estimate | Lower   | Upper   |
|-----------|--------|-----------|------|--------------|---------|---------|
| South     | Male   | White     | PWID | 0.02620      | 0.02291 | 0.02978 |
| South     | Male   | White     | MSM  | 0.01406      | 0.01290 | 0.01538 |
| South     | Male   | White     | MWID | 0.02353      | 0.02058 | 0.02698 |
| South     | Male   | White     | HET  | 0.01567      | 0.01402 | 0.01763 |
| South     | Male   | Black     | PWID | 0.02961      | 0.02665 | 0.03293 |
| South     | Male   | Black     | MSM  | 0.01590      | 0.01471 | 0.01726 |
| South     | Male   | Black     | MWID | 0.02659      | 0.02347 | 0.02975 |
| South     | Male   | Black     | HET  | 0.01771      | 0.01640 | 0.01920 |
| South     | Male   | Hispanic  | PWID | 0.02080      | 0.01817 | 0.02377 |
| South     | Male   | Hispanic  | MSM  | 0.01114      | 0.01000 | 0.01238 |
| South     | Male   | Hispanic  | MWID | 0.01867      | 0.01612 | 0.02171 |
| South     | Male   | Hispanic  | HET  | 0.01242      | 0.01107 | 0.01393 |
| South     | Female | White     | PWID | 0.02620      | 0.02277 | 0.03000 |
| South     | Female | White     | HET  | 0.01567      | 0.01399 | 0.01755 |
| South     | Female | Black     | PWID | 0.02961      | 0.02682 | 0.03264 |
| South     | Female | Black     | HET  | 0.01771      | 0.01645 | 0.01927 |
| South     | Female | Hispanic  | PWID | 0.02080      | 0.01824 | 0.02398 |
| South     | Female | Hispanic  | HET  | 0.01242      | 0.01102 | 0.01397 |
| Northeast | Male   | White     | PWID | 0.00925      | 0.00741 | 0.01151 |
| Northeast | Male   | White     | MSM  | 0.00661      | 0.00588 | 0.00753 |
| Northeast | Male   | White     | MWID | 0.00703      | 0.00571 | 0.00869 |
| Northeast | Male   | White     | HET  | 0.00871      | 0.00734 | 0.01060 |
| Northeast | Male   | Black     | PWID | 0.00939      | 0.00790 | 0.01122 |
| Northeast | Male   | Black     | MSM  | 0.00671      | 0.00581 | 0.00758 |
| Northeast | Male   | Black     | MWID | 0.00713      | 0.00573 | 0.00880 |
| Northeast | Male   | Black     | HET  | 0.00884      | 0.00768 | 0.01013 |
| Northeast | Male   | Hispanic  | PWID | 0.01032      | 0.00864 | 0.01225 |
| Northeast | Male   | Hispanic  | MSM  | 0.00737      | 0.00641 | 0.00836 |
| Northeast | Male   | Hispanic  | MWID | 0.00784      | 0.00637 | 0.00973 |
| Northeast | Male   | Hispanic  | HET  | 0.00971      | 0.00843 | 0.01117 |
| Northeast | Female | White     | PWID | 0.00925      | 0.00752 | 0.01142 |
| Northeast | Female | White     | HET  | 0.00871      | 0.00731 | 0.01056 |
| Northeast | Female | Black     | PWID | 0.00939      | 0.00791 | 0.01124 |
| Northeast | Female | Black     | HET  | 0.00884      | 0.00768 | 0.01019 |
| Northeast | Female | Hispanic  | PWID | 0.01032      | 0.00875 | 0.01238 |
| Northeast | Female | Hispanic  | HET  | 0.00971      | 0.00846 | 0.01118 |
| West      | Male   | White     | PWID | 0.01277      | 0.01007 | 0.01624 |
| West      | Male   | White     | MSM  | 0.01099      | 0.00967 | 0.01224 |
| West      | Male   | White     | MWID | 0.01340      | 0.01076 | 0.01675 |
| West      | Male   | White     | HET  | 0.01047      | 0.00832 | 0.01300 |
| West      | Male   | Black     | PWID | 0.01430      | 0.01081 | 0.01897 |
| West      | Male   | Black     | MSM  | 0.01230      | 0.01018 | 0.01499 |
| West      | Male   | Black     | MWID | 0.01500      | 0.01141 | 0.01961 |
| West      | Male   | Black     | HET  | 0.01173      | 0.00941 | 0.01497 |
| West      | Male   | Hispanic  | PWID | 0.01067      | 0.00802 | 0.01403 |
| West      | Male   | Hispanic  | MSM  | 0.00918      | 0.00786 | 0.01082 |
| West      | Male   | Hispanic  | MWID | 0.01120      | 0.00855 | 0.01427 |
| West      | Male   | Hispanic  | HET  | 0.00875      | 0.00695 | 0.01115 |
| West      | Female | White     | PWID | 0.01277      | 0.00984 | 0.01650 |
| West      | Female | White     | HET  | 0.01047      | 0.00854 | 0.01284 |
| West      | Female | Black     | PWID | 0.01430      | 0.01112 | 0.01864 |
| West      | Female | Black     | HET  | 0.01173      | 0.00936 | 0.01478 |
| West      | Female | Hispanic  | PWID | 0.01067      | 0.00796 | 0.01424 |
| West      | Female | Hispanic  | HET  | 0.00875      | 0.00700 | 0.01100 |

**ART dropout rate (CD4 <200)**

| Region    | Gender | Ethnicity | Risk | Pt. Estimate | Lower   | Upper   |
|-----------|--------|-----------|------|--------------|---------|---------|
| South     | Male   | White     | PWID | 0.03141      | 0.02577 | 0.03803 |
| South     | Male   | White     | MSM  | 0.01883      | 0.01615 | 0.02210 |
| South     | Male   | White     | MWID | 0.02813      | 0.02319 | 0.03414 |
| South     | Male   | White     | HET  | 0.02104      | 0.01760 | 0.02498 |
| South     | Male   | Black     | PWID | 0.04053      | 0.03492 | 0.04730 |
| South     | Male   | Black     | MSM  | 0.02434      | 0.02148 | 0.02766 |
| South     | Male   | Black     | MWID | 0.03633      | 0.03018 | 0.04393 |
| South     | Male   | Black     | HET  | 0.02718      | 0.02412 | 0.03059 |
| South     | Male   | Hispanic  | PWID | 0.02403      | 0.01915 | 0.02931 |
| South     | Male   | Hispanic  | MSM  | 0.01437      | 0.01200 | 0.01709 |
| South     | Male   | Hispanic  | MWID | 0.02153      | 0.01693 | 0.02702 |
| South     | Male   | Hispanic  | HET  | 0.01605      | 0.01333 | 0.01920 |
| South     | Female | White     | PWID | 0.03141      | 0.02598 | 0.03825 |
| South     | Female | White     | HET  | 0.02104      | 0.01763 | 0.02504 |
| South     | Female | Black     | PWID | 0.04053      | 0.03514 | 0.04736 |
| South     | Female | Black     | HET  | 0.02718      | 0.02425 | 0.03044 |
| South     | Female | Hispanic  | PWID | 0.02403      | 0.01951 | 0.02933 |
| South     | Female | Hispanic  | HET  | 0.01605      | 0.01328 | 0.01929 |
| Northeast | Male   | White     | PWID | 0.01292      | 0.00983 | 0.01747 |
| Northeast | Male   | White     | MSM  | 0.01126      | 0.00884 | 0.01445 |
| Northeast | Male   | White     | MWID | 0.01374      | 0.01008 | 0.01903 |
| Northeast | Male   | White     | HET  | 0.01059      | 0.00798 | 0.01421 |
| Northeast | Male   | Black     | PWID | 0.01561      | 0.01225 | 0.01962 |
| Northeast | Male   | Black     | MSM  | 0.01358      | 0.01104 | 0.01643 |
| Northeast | Male   | Black     | MWID | 0.01659      | 0.01259 | 0.02188 |
| Northeast | Male   | Black     | HET  | 0.01278      | 0.01043 | 0.01591 |
| Northeast | Male   | Hispanic  | PWID | 0.01701      | 0.01333 | 0.02178 |
| Northeast | Male   | Hispanic  | MSM  | 0.01478      | 0.01174 | 0.01837 |
| Northeast | Male   | Hispanic  | MWID | 0.01806      | 0.01333 | 0.02416 |
| Northeast | Male   | Hispanic  | HET  | 0.01392      | 0.01127 | 0.01686 |
| Northeast | Female | White     | PWID | 0.01292      | 0.00961 | 0.01723 |
| Northeast | Female | White     | HET  | 0.01059      | 0.00809 | 0.01372 |
| Northeast | Female | Black     | PWID | 0.01561      | 0.01248 | 0.01977 |
| Northeast | Female | Black     | HET  | 0.01278      | 0.01057 | 0.01540 |
| Northeast | Female | Hispanic  | PWID | 0.01701      | 0.01308 | 0.02210 |
| Northeast | Female | Hispanic  | HET  | 0.01392      | 0.01144 | 0.01710 |
| West      | Male   | White     | PWID | 0.02406      | 0.01704 | 0.03332 |
| West      | Male   | White     | MSM  | 0.01412      | 0.01126 | 0.01769 |
| West      | Male   | White     | MWID | 0.02075      | 0.01511 | 0.02876 |
| West      | Male   | White     | HET  | 0.01638      | 0.01212 | 0.02244 |
| West      | Male   | Black     | PWID | 0.02595      | 0.01829 | 0.03651 |
| West      | Male   | Black     | MSM  | 0.01523      | 0.01160 | 0.02014 |
| West      | Male   | Black     | MWID | 0.02239      | 0.01562 | 0.03198 |
| West      | Male   | Black     | HET  | 0.01766      | 0.01308 | 0.02394 |
| West      | Male   | Hispanic  | PWID | 0.01760      | 0.01155 | 0.02598 |
| West      | Male   | Hispanic  | MSM  | 0.01033      | 0.00777 | 0.01381 |
| West      | Male   | Hispanic  | MWID | 0.01519      | 0.01007 | 0.02278 |
| West      | Male   | Hispanic  | HET  | 0.01197      | 0.00840 | 0.01666 |
| West      | Female | White     | PWID | 0.02406      | 0.01691 | 0.03385 |
| West      | Female | White     | HET  | 0.01638      | 0.01239 | 0.02234 |
| West      | Female | Black     | PWID | 0.02595      | 0.01820 | 0.03742 |
| West      | Female | Black     | HET  | 0.01766      | 0.01326 | 0.02423 |
| West      | Female | Hispanic  | PWID | 0.01760      | 0.01191 | 0.02636 |
| West      | Female | Hispanic  | HET  | 0.01197      | 0.00855 | 0.01701 |

**ART re-initiation rate (no CD4 stratification)**

| <b>Region</b>    | <b>Gender</b> | <b>Ethnicity</b> | <b>Risk</b> | <b>Pt. Estimate</b> | <b>Lower</b> | <b>Upper</b> |
|------------------|---------------|------------------|-------------|---------------------|--------------|--------------|
| <b>South</b>     | Male          | White            | PWID        | 0.04029             | 0.04453      | 0.03626      |
| <b>South</b>     | Male          | White            | MSM         | 0.04532             | 0.04845      | 0.04242      |
| <b>South</b>     | Male          | White            | MWID        | 0.04398             | 0.04851      | 0.03958      |
| <b>South</b>     | Male          | White            | HET         | 0.04120             | 0.04486      | 0.03752      |
| <b>South</b>     | Male          | Black            | PWID        | 0.04616             | 0.05006      | 0.04276      |
| <b>South</b>     | Male          | Black            | MSM         | 0.05074             | 0.05384      | 0.04775      |
| <b>South</b>     | Male          | Black            | MWID        | 0.04946             | 0.05391      | 0.04475      |
| <b>South</b>     | Male          | Black            | HET         | 0.04705             | 0.05016      | 0.04427      |
| <b>South</b>     | Male          | Hispanic         | PWID        | 0.05224             | 0.05771      | 0.04669      |
| <b>South</b>     | Male          | Hispanic         | MSM         | 0.05667             | 0.06146      | 0.05214      |
| <b>South</b>     | Male          | Hispanic         | MWID        | 0.05553             | 0.06220      | 0.04908      |
| <b>South</b>     | Male          | Hispanic         | HET         | 0.05299             | 0.05754      | 0.04855      |
| <b>South</b>     | Female        | White            | PWID        | 0.04029             | 0.04475      | 0.03631      |
| <b>South</b>     | Female        | White            | HET         | 0.04120             | 0.04473      | 0.03738      |
| <b>South</b>     | Female        | Black            | PWID        | 0.04616             | 0.04980      | 0.04265      |
| <b>South</b>     | Female        | Black            | HET         | 0.04705             | 0.04977      | 0.04425      |
| <b>South</b>     | Female        | Hispanic         | PWID        | 0.05224             | 0.05779      | 0.04696      |
| <b>South</b>     | Female        | Hispanic         | HET         | 0.05299             | 0.05742      | 0.04868      |
| <b>Northeast</b> | Male          | White            | PWID        | 0.02333             | 0.02728      | 0.01962      |
| <b>Northeast</b> | Male          | White            | MSM         | 0.02860             | 0.03133      | 0.02584      |
| <b>Northeast</b> | Male          | White            | MWID        | 0.02480             | 0.02870      | 0.02091      |
| <b>Northeast</b> | Male          | White            | HET         | 0.02694             | 0.03087      | 0.02321      |
| <b>Northeast</b> | Male          | Black            | PWID        | 0.02820             | 0.03180      | 0.02504      |
| <b>Northeast</b> | Male          | Black            | MSM         | 0.03408             | 0.03711      | 0.03114      |
| <b>Northeast</b> | Male          | Black            | MWID        | 0.02947             | 0.03395      | 0.02533      |
| <b>Northeast</b> | Male          | Black            | HET         | 0.03269             | 0.03572      | 0.02973      |
| <b>Northeast</b> | Male          | Hispanic         | PWID        | 0.03533             | 0.03994      | 0.03112      |
| <b>Northeast</b> | Male          | Hispanic         | MSM         | 0.04318             | 0.04718      | 0.03948      |
| <b>Northeast</b> | Male          | Hispanic         | MWID        | 0.03747             | 0.04336      | 0.03222      |
| <b>Northeast</b> | Male          | Hispanic         | HET         | 0.04076             | 0.04498      | 0.03707      |
| <b>Northeast</b> | Female        | White            | PWID        | 0.02333             | 0.02743      | 0.01963      |
| <b>Northeast</b> | Female        | White            | HET         | 0.02694             | 0.03091      | 0.02322      |
| <b>Northeast</b> | Female        | Black            | PWID        | 0.02820             | 0.03176      | 0.02479      |
| <b>Northeast</b> | Female        | Black            | HET         | 0.03269             | 0.03573      | 0.02987      |
| <b>Northeast</b> | Female        | Hispanic         | PWID        | 0.03533             | 0.03995      | 0.03132      |
| <b>Northeast</b> | Female        | Hispanic         | HET         | 0.04076             | 0.04505      | 0.03731      |
| <b>West</b>      | Male          | White            | PWID        | 0.01865             | 0.02419      | 0.01305      |
| <b>West</b>      | Male          | White            | MSM         | 0.01766             | 0.01955      | 0.01589      |
| <b>West</b>      | Male          | White            | MWID        | 0.01746             | 0.02106      | 0.01410      |
| <b>West</b>      | Male          | White            | HET         | 0.01825             | 0.02257      | 0.01454      |
| <b>West</b>      | Male          | Black            | PWID        | 0.02276             | 0.02918      | 0.01728      |
| <b>West</b>      | Male          | Black            | MSM         | 0.02073             | 0.02413      | 0.01795      |
| <b>West</b>      | Male          | Black            | MWID        | 0.02102             | 0.02651      | 0.01643      |
| <b>West</b>      | Male          | Black            | HET         | 0.02180             | 0.02618      | 0.01778      |
| <b>West</b>      | Male          | Hispanic         | PWID        | 0.02225             | 0.03009      | 0.01473      |
| <b>West</b>      | Male          | Hispanic         | MSM         | 0.01935             | 0.02266      | 0.01672      |
| <b>West</b>      | Male          | Hispanic         | MWID        | 0.01976             | 0.02453      | 0.01516      |
| <b>West</b>      | Male          | Hispanic         | HET         | 0.02109             | 0.02681      | 0.01556      |
| <b>West</b>      | Female        | White            | PWID        | 0.01865             | 0.02400      | 0.01263      |
| <b>West</b>      | Female        | White            | HET         | 0.01825             | 0.02275      | 0.01419      |
| <b>West</b>      | Female        | Black            | PWID        | 0.02276             | 0.02897      | 0.01710      |
| <b>West</b>      | Female        | Black            | HET         | 0.02180             | 0.02620      | 0.01797      |
| <b>West</b>      | Female        | Hispanic         | PWID        | 0.02225             | 0.02977      | 0.01433      |
| <b>West</b>      | Female        | Hispanic         | HET         | 0.02109             | 0.02656      | 0.01606      |

**Disease progression on ART (CD4 ≥500 to CD4 200-499)**

| <b>Region</b> | <b>Gender</b> | <b>Ethnicity</b> | <b>Risk</b> | <b>Pt. Estimate</b> | <b>Lower</b> | <b>Upper</b> |
|---------------|---------------|------------------|-------------|---------------------|--------------|--------------|
| South         | Male          | White            | PWID        | 0.01569             | 0.01348      | 0.01832      |
| South         | Male          | White            | MSM         | 0.01105             | 0.01009      | 0.01215      |
| South         | Male          | White            | MWID        | 0.01335             | 0.01156      | 0.01533      |
| South         | Male          | White            | HET         | 0.01300             | 0.01155      | 0.01478      |
| South         | Male          | Black            | PWID        | 0.01589             | 0.01389      | 0.01802      |
| South         | Male          | Black            | MSM         | 0.01120             | 0.01029      | 0.01222      |
| South         | Male          | Black            | MWID        | 0.01353             | 0.01166      | 0.01546      |
| South         | Male          | Black            | HET         | 0.01317             | 0.01201      | 0.01450      |
| South         | Male          | Hispanic         | PWID        | 0.01822             | 0.01563      | 0.02151      |
| South         | Male          | Hispanic         | MSM         | 0.01280             | 0.01159      | 0.01426      |
| South         | Male          | Hispanic         | MWID        | 0.01549             | 0.01324      | 0.01841      |
| South         | Male          | Hispanic         | HET         | 0.01507             | 0.01345      | 0.01696      |
| South         | Female        | White            | PWID        | 0.01569             | 0.01340      | 0.01853      |
| South         | Female        | White            | HET         | 0.01300             | 0.01152      | 0.01495      |
| South         | Female        | Black            | PWID        | 0.01589             | 0.01393      | 0.01807      |
| South         | Female        | Black            | HET         | 0.01317             | 0.01200      | 0.01443      |
| South         | Female        | Hispanic         | PWID        | 0.01822             | 0.01562      | 0.02131      |
| South         | Female        | Hispanic         | HET         | 0.01507             | 0.01336      | 0.01705      |
| Northeast     | Male          | White            | PWID        | 0.01141             | 0.00983      | 0.01325      |
| Northeast     | Male          | White            | MSM         | 0.00772             | 0.00715      | 0.00836      |
| Northeast     | Male          | White            | MWID        | 0.00968             | 0.00851      | 0.01105      |
| Northeast     | Male          | White            | HET         | 0.00911             | 0.00810      | 0.01037      |
| Northeast     | Male          | Black            | PWID        | 0.01438             | 0.01265      | 0.01625      |
| Northeast     | Male          | Black            | MSM         | 0.00974             | 0.00896      | 0.01053      |
| Northeast     | Male          | Black            | MWID        | 0.01220             | 0.01051      | 0.01415      |
| Northeast     | Male          | Black            | HET         | 0.01149             | 0.01034      | 0.01273      |
| Northeast     | Male          | Hispanic         | PWID        | 0.01423             | 0.01244      | 0.01632      |
| Northeast     | Male          | Hispanic         | MSM         | 0.00964             | 0.00876      | 0.01048      |
| Northeast     | Male          | Hispanic         | MWID        | 0.01207             | 0.01049      | 0.01402      |
| Northeast     | Male          | Hispanic         | HET         | 0.01137             | 0.01020      | 0.01270      |
| Northeast     | Female        | White            | PWID        | 0.01141             | 0.00998      | 0.01328      |
| Northeast     | Female        | White            | HET         | 0.00911             | 0.00800      | 0.01039      |
| Northeast     | Female        | Black            | PWID        | 0.01438             | 0.01283      | 0.01620      |
| Northeast     | Female        | Black            | HET         | 0.01149             | 0.01048      | 0.01267      |
| Northeast     | Female        | Hispanic         | PWID        | 0.01423             | 0.01261      | 0.01619      |
| Northeast     | Female        | Hispanic         | HET         | 0.01137             | 0.01018      | 0.01255      |
| West          | Male          | White            | PWID        | 0.01314             | 0.01046      | 0.01658      |
| West          | Male          | White            | MSM         | 0.00984             | 0.00890      | 0.01083      |
| West          | Male          | White            | MWID        | 0.01175             | 0.00968      | 0.01420      |
| West          | Male          | White            | HET         | 0.01102             | 0.00910      | 0.01330      |
| West          | Male          | Black            | PWID        | 0.01467             | 0.01137      | 0.01831      |
| West          | Male          | Black            | MSM         | 0.01099             | 0.00931      | 0.01295      |
| West          | Male          | Black            | MWID        | 0.01311             | 0.01035      | 0.01644      |
| West          | Male          | Black            | HET         | 0.01230             | 0.01002      | 0.01534      |
| West          | Male          | Hispanic         | PWID        | 0.01352             | 0.01048      | 0.01708      |
| West          | Male          | Hispanic         | MSM         | 0.01012             | 0.00875      | 0.01172      |
| West          | Male          | Hispanic         | MWID        | 0.01208             | 0.00951      | 0.01497      |
| West          | Male          | Hispanic         | HET         | 0.01133             | 0.00925      | 0.01403      |
| West          | Female        | White            | PWID        | 0.01314             | 0.01037      | 0.01614      |
| West          | Female        | White            | HET         | 0.01102             | 0.00909      | 0.01330      |
| West          | Female        | Black            | PWID        | 0.01467             | 0.01150      | 0.01870      |
| West          | Female        | Black            | HET         | 0.01230             | 0.01007      | 0.01515      |
| West          | Female        | Hispanic         | PWID        | 0.01352             | 0.01048      | 0.01697      |
| West          | Female        | Hispanic         | HET         | 0.01133             | 0.00927      | 0.01376      |

**Disease progression on ART (CD4 ≥500 to CD4 <200)**

| <b>Region</b> | <b>Gender</b> | <b>Ethnicity</b> | <b>Risk</b> | <b>Pt. Estimate</b> | <b>Lower</b> | <b>Upper</b> |
|---------------|---------------|------------------|-------------|---------------------|--------------|--------------|
| South         | Male          | White            | PWID        | 0.00016             | 0.00014      | 0.00019      |
| South         | Male          | White            | MSM         | 0.00009             | 0.00008      | 0.00010      |
| South         | Male          | White            | MWID        | 0.00013             | 0.00011      | 0.00015      |
| South         | Male          | White            | HET         | 0.00012             | 0.00010      | 0.00013      |
| South         | Male          | Black            | PWID        | 0.00019             | 0.00016      | 0.00021      |
| South         | Male          | Black            | MSM         | 0.00011             | 0.00010      | 0.00012      |
| South         | Male          | Black            | MWID        | 0.00015             | 0.00013      | 0.00017      |
| South         | Male          | Black            | HET         | 0.00013             | 0.00012      | 0.00015      |
| South         | Male          | Hispanic         | PWID        | 0.00015             | 0.00013      | 0.00018      |
| South         | Male          | Hispanic         | MSM         | 0.00008             | 0.00007      | 0.00010      |
| South         | Male          | Hispanic         | MWID        | 0.00012             | 0.00010      | 0.00014      |
| South         | Male          | Hispanic         | HET         | 0.00011             | 0.00009      | 0.00012      |
| South         | Female        | White            | PWID        | 0.00016             | 0.00014      | 0.00020      |
| South         | Female        | White            | HET         | 0.00012             | 0.00010      | 0.00013      |
| South         | Female        | Black            | PWID        | 0.00019             | 0.00016      | 0.00022      |
| South         | Female        | Black            | HET         | 0.00013             | 0.00012      | 0.00015      |
| South         | Female        | Hispanic         | PWID        | 0.00015             | 0.00013      | 0.00018      |
| South         | Female        | Hispanic         | HET         | 0.00011             | 0.00009      | 0.00012      |
| Northeast     | Male          | White            | PWID        | 0.00005             | 0.00004      | 0.00007      |
| Northeast     | Male          | White            | MSM         | 0.00002             | 0.00002      | 0.00003      |
| Northeast     | Male          | White            | MWID        | 0.00003             | 0.00003      | 0.00004      |
| Northeast     | Male          | White            | HET         | 0.00004             | 0.00003      | 0.00005      |
| Northeast     | Male          | Black            | PWID        | 0.00008             | 0.00007      | 0.00010      |
| Northeast     | Male          | Black            | MSM         | 0.00004             | 0.00003      | 0.00004      |
| Northeast     | Male          | Black            | MWID        | 0.00005             | 0.00004      | 0.00006      |
| Northeast     | Male          | Black            | HET         | 0.00006             | 0.00006      | 0.00007      |
| Northeast     | Male          | Hispanic         | PWID        | 0.00008             | 0.00006      | 0.00009      |
| Northeast     | Male          | Hispanic         | MSM         | 0.00003             | 0.00003      | 0.00004      |
| Northeast     | Male          | Hispanic         | MWID        | 0.00005             | 0.00004      | 0.00006      |
| Northeast     | Male          | Hispanic         | HET         | 0.00006             | 0.00005      | 0.00007      |
| Northeast     | Female        | White            | PWID        | 0.00005             | 0.00004      | 0.00007      |
| Northeast     | Female        | White            | HET         | 0.00004             | 0.00003      | 0.00005      |
| Northeast     | Female        | Black            | PWID        | 0.00008             | 0.00007      | 0.00010      |
| Northeast     | Female        | Black            | HET         | 0.00006             | 0.00006      | 0.00007      |
| Northeast     | Female        | Hispanic         | PWID        | 0.00008             | 0.00006      | 0.00009      |
| Northeast     | Female        | Hispanic         | HET         | 0.00006             | 0.00005      | 0.00007      |
| West          | Male          | White            | PWID        | 0.00008             | 0.00006      | 0.00011      |
| West          | Male          | White            | MSM         | 0.00004             | 0.00003      | 0.00005      |
| West          | Male          | White            | MWID        | 0.00006             | 0.00005      | 0.00008      |
| West          | Male          | White            | HET         | 0.00006             | 0.00004      | 0.00007      |
| West          | Male          | Black            | PWID        | 0.00010             | 0.00008      | 0.00014      |
| West          | Male          | Black            | MSM         | 0.00005             | 0.00004      | 0.00007      |
| West          | Male          | Black            | MWID        | 0.00008             | 0.00005      | 0.00011      |
| West          | Male          | Black            | HET         | 0.00007             | 0.00006      | 0.00009      |
| West          | Male          | Hispanic         | PWID        | 0.00009             | 0.00007      | 0.00013      |
| West          | Male          | Hispanic         | MSM         | 0.00005             | 0.00004      | 0.00006      |
| West          | Male          | Hispanic         | MWID        | 0.00007             | 0.00005      | 0.00009      |
| West          | Male          | Hispanic         | HET         | 0.00006             | 0.00005      | 0.00008      |
| West          | Female        | White            | PWID        | 0.00008             | 0.00006      | 0.00011      |
| West          | Female        | White            | HET         | 0.00006             | 0.00004      | 0.00007      |
| West          | Female        | Black            | PWID        | 0.00010             | 0.00008      | 0.00014      |
| West          | Female        | Black            | HET         | 0.00007             | 0.00005      | 0.00009      |
| West          | Female        | Hispanic         | PWID        | 0.00009             | 0.00007      | 0.00013      |
| West          | Female        | Hispanic         | HET         | 0.00006             | 0.00005      | 0.00008      |

**Disease progression on ART (CD4 200-499 to CD4 <200)**

| <b>Region</b> | <b>Gender</b> | <b>Ethnicity</b> | <b>Risk</b> | <b>Pt. Estimate</b> | <b>Lower</b> | <b>Upper</b> |
|---------------|---------------|------------------|-------------|---------------------|--------------|--------------|
| South         | Male          | White            | PWID        | 0.00814             | 0.00653      | 0.01000      |
| South         | Male          | White            | MSM         | 0.00590             | 0.00509      | 0.00679      |
| South         | Male          | White            | MWID        | 0.00703             | 0.00568      | 0.00887      |
| South         | Male          | White            | HET         | 0.00684             | 0.00568      | 0.00814      |
| South         | Male          | Black            | PWID        | 0.00781             | 0.00653      | 0.00932      |
| South         | Male          | Black            | MSM         | 0.00565             | 0.00492      | 0.00643      |
| South         | Male          | Black            | MWID        | 0.00673             | 0.00554      | 0.00834      |
| South         | Male          | Black            | HET         | 0.00656             | 0.00570      | 0.00743      |
| South         | Male          | Hispanic         | PWID        | 0.00702             | 0.00570      | 0.00885      |
| South         | Male          | Hispanic         | MSM         | 0.00506             | 0.00426      | 0.00599      |
| South         | Male          | Hispanic         | MWID        | 0.00606             | 0.00476      | 0.00773      |
| South         | Male          | Hispanic         | HET         | 0.00587             | 0.00495      | 0.00705      |
| South         | Female        | White            | PWID        | 0.00814             | 0.00655      | 0.01028      |
| South         | Female        | White            | HET         | 0.00684             | 0.00559      | 0.00824      |
| South         | Female        | Black            | PWID        | 0.00781             | 0.00654      | 0.00942      |
| South         | Female        | Black            | HET         | 0.00656             | 0.00577      | 0.00751      |
| South         | Female        | Hispanic         | PWID        | 0.00702             | 0.00567      | 0.00906      |
| South         | Female        | Hispanic         | HET         | 0.00587             | 0.00496      | 0.00706      |
| Northeast     | Male          | White            | PWID        | 0.00693             | 0.00554      | 0.00869      |
| Northeast     | Male          | White            | MSM         | 0.00429             | 0.00366      | 0.00501      |
| Northeast     | Male          | White            | MWID        | 0.00544             | 0.00435      | 0.00677      |
| Northeast     | Male          | White            | HET         | 0.00546             | 0.00438      | 0.00677      |
| Northeast     | Male          | Black            | PWID        | 0.00830             | 0.00682      | 0.01002      |
| Northeast     | Male          | Black            | MSM         | 0.00514             | 0.00440      | 0.00593      |
| Northeast     | Male          | Black            | MWID        | 0.00652             | 0.00523      | 0.00805      |
| Northeast     | Male          | Black            | HET         | 0.00654             | 0.00559      | 0.00770      |
| Northeast     | Male          | Hispanic         | PWID        | 0.00745             | 0.00617      | 0.00901      |
| Northeast     | Male          | Hispanic         | MSM         | 0.00461             | 0.00394      | 0.00542      |
| Northeast     | Male          | Hispanic         | MWID        | 0.00585             | 0.00461      | 0.00722      |
| Northeast     | Male          | Hispanic         | HET         | 0.00587             | 0.00494      | 0.00693      |
| Northeast     | Female        | White            | PWID        | 0.00693             | 0.00552      | 0.00883      |
| Northeast     | Female        | White            | HET         | 0.00546             | 0.00429      | 0.00682      |
| Northeast     | Female        | Black            | PWID        | 0.00830             | 0.00695      | 0.00985      |
| Northeast     | Female        | Black            | HET         | 0.00654             | 0.00568      | 0.00763      |
| Northeast     | Female        | Hispanic         | PWID        | 0.00745             | 0.00617      | 0.00906      |
| Northeast     | Female        | Hispanic         | HET         | 0.00587             | 0.00497      | 0.00703      |
| West          | Male          | White            | PWID        | 0.00775             | 0.00563      | 0.01072      |
| West          | Male          | White            | MSM         | 0.00499             | 0.00418      | 0.00594      |
| West          | Male          | White            | MWID        | 0.00607             | 0.00455      | 0.00815      |
| West          | Male          | White            | HET         | 0.00638             | 0.00478      | 0.00848      |
| West          | Male          | Black            | PWID        | 0.00943             | 0.00668      | 0.01314      |
| West          | Male          | Black            | MSM         | 0.00608             | 0.00478      | 0.00786      |
| West          | Male          | Black            | MWID        | 0.00739             | 0.00507      | 0.01060      |
| West          | Male          | Black            | HET         | 0.00776             | 0.00587      | 0.01024      |
| West          | Male          | Hispanic         | PWID        | 0.00884             | 0.00623      | 0.01242      |
| West          | Male          | Hispanic         | MSM         | 0.00569             | 0.00455      | 0.00707      |
| West          | Male          | Hispanic         | MWID        | 0.00693             | 0.00480      | 0.00988      |
| West          | Male          | Hispanic         | HET         | 0.00727             | 0.00541      | 0.00962      |
| West          | Female        | White            | PWID        | 0.00775             | 0.00560      | 0.01075      |
| West          | Female        | White            | HET         | 0.00638             | 0.00473      | 0.00858      |
| West          | Female        | Black            | PWID        | 0.00943             | 0.00676      | 0.01313      |
| West          | Female        | Black            | HET         | 0.00776             | 0.00578      | 0.01039      |
| West          | Female        | Hispanic         | PWID        | 0.00884             | 0.00619      | 0.01242      |
| West          | Female        | Hispanic         | HET         | 0.00727             | 0.00546      | 0.00947      |

**Disease progression on ART (CD4 200-499 to CD4 ≥500)**

| <b>Region</b> | <b>Gender</b> | <b>Ethnicity</b> | <b>Risk</b> | <b>Pt. Estimate</b> | <b>Lower</b> | <b>Upper</b> |
|---------------|---------------|------------------|-------------|---------------------|--------------|--------------|
| South         | Male          | White            | PWID        | 0.01427             | 0.01225      | 0.01677      |
| South         | Male          | White            | MSM         | 0.01709             | 0.01577      | 0.01854      |
| South         | Male          | White            | MWID        | 0.01553             | 0.01345      | 0.01788      |
| South         | Male          | White            | HET         | 0.01573             | 0.01404      | 0.01759      |
| South         | Male          | Black            | PWID        | 0.01480             | 0.01305      | 0.01687      |
| South         | Male          | Black            | MSM         | 0.01773             | 0.01638      | 0.01914      |
| South         | Male          | Black            | MWID        | 0.01611             | 0.01398      | 0.01867      |
| South         | Male          | Black            | HET         | 0.01632             | 0.01506      | 0.01768      |
| South         | Male          | Hispanic         | PWID        | 0.01271             | 0.01101      | 0.01487      |
| South         | Male          | Hispanic         | MSM         | 0.01519             | 0.01390      | 0.01668      |
| South         | Male          | Hispanic         | MWID        | 0.01382             | 0.01180      | 0.01621      |
| South         | Male          | Hispanic         | HET         | 0.01398             | 0.01256      | 0.01557      |
| South         | Female        | White            | PWID        | 0.01427             | 0.01208      | 0.01660      |
| South         | Female        | White            | HET         | 0.01573             | 0.01407      | 0.01768      |
| South         | Female        | Black            | PWID        | 0.01480             | 0.01307      | 0.01692      |
| South         | Female        | Black            | HET         | 0.01632             | 0.01495      | 0.01773      |
| South         | Female        | Hispanic         | PWID        | 0.01271             | 0.01100      | 0.01472      |
| South         | Female        | Hispanic         | HET         | 0.01398             | 0.01257      | 0.01554      |
| Northeast     | Male          | White            | PWID        | 0.01688             | 0.01472      | 0.01924      |
| Northeast     | Male          | White            | MSM         | 0.01974             | 0.01845      | 0.02121      |
| Northeast     | Male          | White            | MWID        | 0.01910             | 0.01692      | 0.02163      |
| Northeast     | Male          | White            | HET         | 0.01746             | 0.01557      | 0.01961      |
| Northeast     | Male          | Black            | PWID        | 0.01691             | 0.01491      | 0.01897      |
| Northeast     | Male          | Black            | MSM         | 0.01978             | 0.01838      | 0.02138      |
| Northeast     | Male          | Black            | MWID        | 0.01914             | 0.01657      | 0.02185      |
| Northeast     | Male          | Black            | HET         | 0.01750             | 0.01596      | 0.01914      |
| Northeast     | Male          | Hispanic         | PWID        | 0.01771             | 0.01569      | 0.01990      |
| Northeast     | Male          | Hispanic         | MSM         | 0.02071             | 0.01917      | 0.02241      |
| Northeast     | Male          | Hispanic         | MWID        | 0.02003             | 0.01755      | 0.02323      |
| Northeast     | Male          | Hispanic         | HET         | 0.01832             | 0.01669      | 0.02019      |
| Northeast     | Female        | White            | PWID        | 0.01688             | 0.01477      | 0.01942      |
| Northeast     | Female        | White            | HET         | 0.01746             | 0.01546      | 0.01965      |
| Northeast     | Female        | Black            | PWID        | 0.01691             | 0.01498      | 0.01882      |
| Northeast     | Female        | Black            | HET         | 0.01750             | 0.01595      | 0.01920      |
| Northeast     | Female        | Hispanic         | PWID        | 0.01771             | 0.01574      | 0.01992      |
| Northeast     | Female        | Hispanic         | HET         | 0.01832             | 0.01650      | 0.02028      |
| West          | Male          | White            | PWID        | 0.01617             | 0.01311      | 0.01989      |
| West          | Male          | White            | MSM         | 0.01807             | 0.01662      | 0.01983      |
| West          | Male          | White            | MWID        | 0.01774             | 0.01481      | 0.02166      |
| West          | Male          | White            | HET         | 0.01648             | 0.01371      | 0.01967      |
| West          | Male          | Black            | PWID        | 0.01430             | 0.01121      | 0.01815      |
| West          | Male          | Black            | MSM         | 0.01599             | 0.01373      | 0.01859      |
| West          | Male          | Black            | MWID        | 0.01568             | 0.01240      | 0.01973      |
| West          | Male          | Black            | HET         | 0.01458             | 0.01207      | 0.01774      |
| West          | Male          | Hispanic         | PWID        | 0.01307             | 0.01043      | 0.01636      |
| West          | Male          | Hispanic         | MSM         | 0.01461             | 0.01278      | 0.01665      |
| West          | Male          | Hispanic         | MWID        | 0.01434             | 0.01154      | 0.01769      |
| West          | Male          | Hispanic         | HET         | 0.01332             | 0.01100      | 0.01592      |
| West          | Female        | White            | PWID        | 0.01617             | 0.01326      | 0.02011      |
| West          | Female        | White            | HET         | 0.01648             | 0.01363      | 0.01952      |
| West          | Female        | Black            | PWID        | 0.01430             | 0.01135      | 0.01802      |
| West          | Female        | Black            | HET         | 0.01458             | 0.01213      | 0.01771      |
| West          | Female        | Hispanic         | PWID        | 0.01307             | 0.01033      | 0.01672      |
| West          | Female        | Hispanic         | HET         | 0.01332             | 0.01114      | 0.01602      |

**Disease progression on ART (CD4 <200 to CD4 ≥500)**

| <b>Region</b> | <b>Gender</b> | <b>Ethnicity</b> | <b>Risk</b> | <b>Pt. Estimate</b> | <b>Lower</b> | <b>Upper</b> |
|---------------|---------------|------------------|-------------|---------------------|--------------|--------------|
| South         | Male          | White            | PWID        | 0.00040             | 0.00034      | 0.00047      |
| South         | Male          | White            | MSM         | 0.00045             | 0.00040      | 0.00050      |
| South         | Male          | White            | MWID        | 0.00049             | 0.00042      | 0.00059      |
| South         | Male          | White            | HET         | 0.00037             | 0.00032      | 0.00042      |
| South         | Male          | Black            | PWID        | 0.00052             | 0.00045      | 0.00060      |
| South         | Male          | Black            | MSM         | 0.00058             | 0.00053      | 0.00064      |
| South         | Male          | Black            | MWID        | 0.00063             | 0.00054      | 0.00075      |
| South         | Male          | Black            | HET         | 0.00047             | 0.00043      | 0.00052      |
| South         | Male          | Hispanic         | PWID        | 0.00037             | 0.00031      | 0.00044      |
| South         | Male          | Hispanic         | MSM         | 0.00042             | 0.00037      | 0.00048      |
| South         | Male          | Hispanic         | MWID        | 0.00045             | 0.00038      | 0.00055      |
| South         | Male          | Hispanic         | HET         | 0.00034             | 0.00030      | 0.00040      |
| South         | Female        | White            | PWID        | 0.00040             | 0.00034      | 0.00048      |
| South         | Female        | White            | HET         | 0.00037             | 0.00032      | 0.00042      |
| South         | Female        | Black            | PWID        | 0.00052             | 0.00045      | 0.00060      |
| South         | Female        | Black            | HET         | 0.00047             | 0.00043      | 0.00052      |
| South         | Female        | Hispanic         | PWID        | 0.00037             | 0.00031      | 0.00044      |
| South         | Female        | Hispanic         | HET         | 0.00034             | 0.00030      | 0.00040      |
| Northeast     | Male          | White            | PWID        | 0.00025             | 0.00020      | 0.00031      |
| Northeast     | Male          | White            | MSM         | 0.00041             | 0.00036      | 0.00048      |
| Northeast     | Male          | White            | MWID        | 0.00039             | 0.00031      | 0.00047      |
| Northeast     | Male          | White            | HET         | 0.00027             | 0.00022      | 0.00033      |
| Northeast     | Male          | Black            | PWID        | 0.00029             | 0.00025      | 0.00035      |
| Northeast     | Male          | Black            | MSM         | 0.00048             | 0.00042      | 0.00054      |
| Northeast     | Male          | Black            | MWID        | 0.00045             | 0.00037      | 0.00056      |
| Northeast     | Male          | Black            | HET         | 0.00031             | 0.00027      | 0.00036      |
| Northeast     | Male          | Hispanic         | PWID        | 0.00035             | 0.00029      | 0.00042      |
| Northeast     | Male          | Hispanic         | MSM         | 0.00055             | 0.00048      | 0.00064      |
| Northeast     | Male          | Hispanic         | MWID        | 0.00052             | 0.00043      | 0.00066      |
| Northeast     | Male          | Hispanic         | HET         | 0.00036             | 0.00032      | 0.00042      |
| Northeast     | Female        | White            | PWID        | 0.00025             | 0.00021      | 0.00031      |
| Northeast     | Female        | White            | HET         | 0.00027             | 0.00022      | 0.00033      |
| Northeast     | Female        | Black            | PWID        | 0.00029             | 0.00025      | 0.00035      |
| Northeast     | Female        | Black            | HET         | 0.00031             | 0.00027      | 0.00036      |
| Northeast     | Female        | Hispanic         | PWID        | 0.00035             | 0.00029      | 0.00042      |
| Northeast     | Female        | Hispanic         | HET         | 0.00036             | 0.00032      | 0.00042      |
| West          | Male          | White            | PWID        | 0.00031             | 0.00022      | 0.00042      |
| West          | Male          | White            | MSM         | 0.00038             | 0.00033      | 0.00045      |
| West          | Male          | White            | MWID        | 0.00040             | 0.00031      | 0.00054      |
| West          | Male          | White            | HET         | 0.00029             | 0.00023      | 0.00038      |
| West          | Male          | Black            | PWID        | 0.00021             | 0.00016      | 0.00030      |
| West          | Male          | Black            | MSM         | 0.00026             | 0.00020      | 0.00032      |
| West          | Male          | Black            | MWID        | 0.00027             | 0.00020      | 0.00038      |
| West          | Male          | Black            | HET         | 0.00020             | 0.00015      | 0.00026      |
| West          | Male          | Hispanic         | PWID        | 0.00023             | 0.00016      | 0.00031      |
| West          | Male          | Hispanic         | MSM         | 0.00028             | 0.00024      | 0.00035      |
| West          | Male          | Hispanic         | MWID        | 0.00030             | 0.00022      | 0.00040      |
| West          | Male          | Hispanic         | HET         | 0.00022             | 0.00017      | 0.00029      |
| West          | Female        | White            | PWID        | 0.00031             | 0.00023      | 0.00043      |
| West          | Female        | White            | HET         | 0.00029             | 0.00023      | 0.00037      |
| West          | Female        | Black            | PWID        | 0.00021             | 0.00016      | 0.00029      |
| West          | Female        | Black            | HET         | 0.00020             | 0.00016      | 0.00027      |
| West          | Female        | Hispanic         | PWID        | 0.00023             | 0.00016      | 0.00032      |
| West          | Female        | Hispanic         | HET         | 0.00022             | 0.00017      | 0.00028      |

**Disease progression on ART (CD4 <200 to CD4 200-499)**

| <b>Region</b> | <b>Gender</b> | <b>Ethnicity</b> | <b>Risk</b> | <b>Pt. Estimate</b> | <b>Lower</b> | <b>Upper</b> |
|---------------|---------------|------------------|-------------|---------------------|--------------|--------------|
| South         | Male          | White            | PWID        | 0.02636             | 0.02176      | 0.03164      |
| South         | Male          | White            | MSM         | 0.02975             | 0.02642      | 0.03381      |
| South         | Male          | White            | MWID        | 0.03018             | 0.02513      | 0.03599      |
| South         | Male          | White            | HET         | 0.02599             | 0.02229      | 0.03036      |
| South         | Male          | Black            | PWID        | 0.03287             | 0.02837      | 0.03819      |
| South         | Male          | Black            | MSM         | 0.03714             | 0.03324      | 0.04159      |
| South         | Male          | Black            | MWID        | 0.03762             | 0.03154      | 0.04550      |
| South         | Male          | Black            | HET         | 0.03245             | 0.02915      | 0.03606      |
| South         | Male          | Hispanic         | PWID        | 0.03129             | 0.02587      | 0.03736      |
| South         | Male          | Hispanic         | MSM         | 0.03520             | 0.03088      | 0.03970      |
| South         | Male          | Hispanic         | MWID        | 0.03580             | 0.02929      | 0.04363      |
| South         | Male          | Hispanic         | HET         | 0.03076             | 0.02673      | 0.03513      |
| South         | Female        | White            | PWID        | 0.02636             | 0.02195      | 0.03155      |
| South         | Female        | White            | HET         | 0.02599             | 0.02229      | 0.03055      |
| South         | Female        | Black            | PWID        | 0.03287             | 0.02789      | 0.03847      |
| South         | Female        | Black            | HET         | 0.03245             | 0.02928      | 0.03600      |
| South         | Female        | Hispanic         | PWID        | 0.03129             | 0.02600      | 0.03735      |
| South         | Female        | Hispanic         | HET         | 0.03076             | 0.02696      | 0.03508      |
| Northeast     | Male          | White            | PWID        | 0.02144             | 0.01694      | 0.02656      |
| Northeast     | Male          | White            | MSM         | 0.03281             | 0.02822      | 0.03767      |
| Northeast     | Male          | White            | MWID        | 0.03084             | 0.02495      | 0.03840      |
| Northeast     | Male          | White            | HET         | 0.02281             | 0.01901      | 0.02817      |
| Northeast     | Male          | Black            | PWID        | 0.02372             | 0.01967      | 0.02874      |
| Northeast     | Male          | Black            | MSM         | 0.03626             | 0.03204      | 0.04117      |
| Northeast     | Male          | Black            | MWID        | 0.03410             | 0.02749      | 0.04235      |
| Northeast     | Male          | Black            | HET         | 0.02522             | 0.02190      | 0.02936      |
| Northeast     | Male          | Hispanic         | PWID        | 0.02413             | 0.01984      | 0.02924      |
| Northeast     | Male          | Hispanic         | MSM         | 0.03685             | 0.03178      | 0.04290      |
| Northeast     | Male          | Hispanic         | MWID        | 0.03467             | 0.02786      | 0.04334      |
| Northeast     | Male          | Hispanic         | HET         | 0.02565             | 0.02209      | 0.03013      |
| Northeast     | Female        | White            | PWID        | 0.02144             | 0.01730      | 0.02656      |
| Northeast     | Female        | White            | HET         | 0.02281             | 0.01877      | 0.02799      |
| Northeast     | Female        | Black            | PWID        | 0.02372             | 0.01961      | 0.02868      |
| Northeast     | Female        | Black            | HET         | 0.02522             | 0.02180      | 0.02875      |
| Northeast     | Female        | Hispanic         | PWID        | 0.02413             | 0.01981      | 0.02962      |
| Northeast     | Female        | Hispanic         | HET         | 0.02565             | 0.02184      | 0.03009      |
| West          | Male          | White            | PWID        | 0.02916             | 0.02151      | 0.03903      |
| West          | Male          | White            | MSM         | 0.03502             | 0.03035      | 0.04063      |
| West          | Male          | White            | MWID        | 0.03662             | 0.02834      | 0.04727      |
| West          | Male          | White            | HET         | 0.02789             | 0.02207      | 0.03474      |
| West          | Male          | Black            | PWID        | 0.01999             | 0.01417      | 0.02763      |
| West          | Male          | Black            | MSM         | 0.02398             | 0.01889      | 0.03014      |
| West          | Male          | Black            | MWID        | 0.02509             | 0.01852      | 0.03463      |
| West          | Male          | Black            | HET         | 0.01910             | 0.01432      | 0.02455      |
| West          | Male          | Hispanic         | PWID        | 0.02751             | 0.01968      | 0.03676      |
| West          | Male          | Hispanic         | MSM         | 0.03299             | 0.02785      | 0.03895      |
| West          | Male          | Hispanic         | MWID        | 0.03453             | 0.02598      | 0.04566      |
| West          | Male          | Hispanic         | HET         | 0.02628             | 0.02054      | 0.03360      |
| West          | Female        | White            | PWID        | 0.02916             | 0.02178      | 0.03923      |
| West          | Female        | White            | HET         | 0.02789             | 0.02242      | 0.03550      |
| West          | Female        | Black            | PWID        | 0.01999             | 0.01428      | 0.02692      |
| West          | Female        | Black            | HET         | 0.01910             | 0.01468      | 0.02508      |
| West          | Female        | Hispanic         | PWID        | 0.02751             | 0.01954      | 0.03792      |
| West          | Female        | Hispanic         | HET         | 0.02628             | 0.02061      | 0.03362      |

**Mortality rates for PLHIV on ART (CD4 ≥500)**

| Region    | Gender | Ethnicity | Risk | Pt. Estimate | Lower   | Upper   |
|-----------|--------|-----------|------|--------------|---------|---------|
| South     | Male   | White     | PWID | 0.00087      | 0.00054 | 0.00142 |
| South     | Male   | White     | MSM  | 0.00030      | 0.00021 | 0.00044 |
| South     | Male   | White     | MWID | 0.00069      | 0.00044 | 0.00110 |
| South     | Male   | White     | HET  | 0.00038      | 0.00024 | 0.00061 |
| South     | Male   | Black     | PWID | 0.00076      | 0.00051 | 0.00114 |
| South     | Male   | Black     | MSM  | 0.00026      | 0.00018 | 0.00039 |
| South     | Male   | Black     | MWID | 0.00061      | 0.00037 | 0.00099 |
| South     | Male   | Black     | HET  | 0.00033      | 0.00022 | 0.00050 |
| South     | Male   | Hispanic  | PWID | 0.00044      | 0.00027 | 0.00077 |
| South     | Male   | Hispanic  | MSM  | 0.00015      | 0.00009 | 0.00025 |
| South     | Male   | Hispanic  | MWID | 0.00035      | 0.00019 | 0.00065 |
| South     | Male   | Hispanic  | HET  | 0.00019      | 0.00011 | 0.00035 |
| South     | Female | White     | PWID | 0.00067      | 0.00041 | 0.00117 |
| South     | Female | White     | HET  | 0.00029      | 0.00019 | 0.00048 |
| South     | Female | Black     | PWID | 0.00059      | 0.00038 | 0.00088 |
| South     | Female | Black     | HET  | 0.00026      | 0.00018 | 0.00037 |
| South     | Female | Hispanic  | PWID | 0.00034      | 0.00020 | 0.00063 |
| South     | Female | Hispanic  | HET  | 0.00015      | 0.00009 | 0.00026 |
| Northeast | Male   | White     | PWID | 0.00080      | 0.00049 | 0.00129 |
| Northeast | Male   | White     | MSM  | 0.00028      | 0.00020 | 0.00039 |
| Northeast | Male   | White     | MWID | 0.00064      | 0.00041 | 0.00096 |
| Northeast | Male   | White     | HET  | 0.00035      | 0.00022 | 0.00056 |
| Northeast | Male   | Black     | PWID | 0.00070      | 0.00046 | 0.00103 |
| Northeast | Male   | Black     | MSM  | 0.00024      | 0.00017 | 0.00035 |
| Northeast | Male   | Black     | MWID | 0.00056      | 0.00035 | 0.00091 |
| Northeast | Male   | Black     | HET  | 0.00030      | 0.00020 | 0.00045 |
| Northeast | Male   | Hispanic  | PWID | 0.00040      | 0.00023 | 0.00068 |
| Northeast | Male   | Hispanic  | MSM  | 0.00014      | 0.00009 | 0.00022 |
| Northeast | Male   | Hispanic  | MWID | 0.00032      | 0.00018 | 0.00059 |
| Northeast | Male   | Hispanic  | HET  | 0.00018      | 0.00011 | 0.00030 |
| Northeast | Female | White     | PWID | 0.00062      | 0.00039 | 0.00100 |
| Northeast | Female | White     | HET  | 0.00027      | 0.00017 | 0.00042 |
| Northeast | Female | Black     | PWID | 0.00054      | 0.00035 | 0.00086 |
| Northeast | Female | Black     | HET  | 0.00024      | 0.00016 | 0.00033 |
| Northeast | Female | Hispanic  | PWID | 0.00031      | 0.00019 | 0.00057 |
| Northeast | Female | Hispanic  | HET  | 0.00014      | 0.00008 | 0.00022 |
| West      | Male   | White     | PWID | 0.00079      | 0.00044 | 0.00137 |
| West      | Male   | White     | MSM  | 0.00027      | 0.00019 | 0.00041 |
| West      | Male   | White     | MWID | 0.00063      | 0.00039 | 0.00101 |
| West      | Male   | White     | HET  | 0.00034      | 0.00019 | 0.00057 |
| West      | Male   | Black     | PWID | 0.00069      | 0.00042 | 0.00120 |
| West      | Male   | Black     | MSM  | 0.00024      | 0.00015 | 0.00039 |
| West      | Male   | Black     | MWID | 0.00055      | 0.00033 | 0.00097 |
| West      | Male   | Black     | HET  | 0.00030      | 0.00018 | 0.00050 |
| West      | Male   | Hispanic  | PWID | 0.00040      | 0.00022 | 0.00070 |
| West      | Male   | Hispanic  | MSM  | 0.00014      | 0.00008 | 0.00024 |
| West      | Male   | Hispanic  | MWID | 0.00032      | 0.00016 | 0.00062 |
| West      | Male   | Hispanic  | HET  | 0.00017      | 0.00009 | 0.00034 |
| West      | Female | White     | PWID | 0.00061      | 0.00035 | 0.00108 |
| West      | Female | White     | HET  | 0.00026      | 0.00016 | 0.00045 |
| West      | Female | Black     | PWID | 0.00053      | 0.00031 | 0.00093 |
| West      | Female | Black     | HET  | 0.00023      | 0.00014 | 0.00039 |
| West      | Female | Hispanic  | PWID | 0.00031      | 0.00017 | 0.00057 |
| West      | Female | Hispanic  | HET  | 0.00013      | 0.00008 | 0.00025 |

**Mortality rates for PLHIV on ART (CD4 200-499)**

| Region    | Gender | Ethnicity | Risk | Pt. Estimate | Lower   | Upper   |
|-----------|--------|-----------|------|--------------|---------|---------|
| South     | Male   | White     | PWID | 0.00132      | 0.00093 | 0.00196 |
| South     | Male   | White     | MSM  | 0.00059      | 0.00045 | 0.00079 |
| South     | Male   | White     | MWID | 0.00094      | 0.00063 | 0.00138 |
| South     | Male   | White     | HET  | 0.00084      | 0.00060 | 0.00122 |
| South     | Male   | Black     | PWID | 0.00107      | 0.00078 | 0.00144 |
| South     | Male   | Black     | MSM  | 0.00048      | 0.00036 | 0.00067 |
| South     | Male   | Black     | MWID | 0.00076      | 0.00050 | 0.00112 |
| South     | Male   | Black     | HET  | 0.00068      | 0.00052 | 0.00089 |
| South     | Male   | Hispanic  | PWID | 0.00073      | 0.00050 | 0.00108 |
| South     | Male   | Hispanic  | MSM  | 0.00033      | 0.00023 | 0.00048 |
| South     | Male   | Hispanic  | MWID | 0.00052      | 0.00033 | 0.00083 |
| South     | Male   | Hispanic  | HET  | 0.00046      | 0.00032 | 0.00067 |
| South     | Female | White     | PWID | 0.00135      | 0.00092 | 0.00199 |
| South     | Female | White     | HET  | 0.00086      | 0.00060 | 0.00126 |
| South     | Female | Black     | PWID | 0.00109      | 0.00079 | 0.00153 |
| South     | Female | Black     | HET  | 0.00069      | 0.00050 | 0.00093 |
| South     | Female | Hispanic  | PWID | 0.00074      | 0.00051 | 0.00118 |
| South     | Female | Hispanic  | HET  | 0.00047      | 0.00032 | 0.00069 |
| Northeast | Male   | White     | PWID | 0.00140      | 0.00098 | 0.00203 |
| Northeast | Male   | White     | MSM  | 0.00063      | 0.00047 | 0.00085 |
| Northeast | Male   | White     | MWID | 0.00098      | 0.00069 | 0.00144 |
| Northeast | Male   | White     | HET  | 0.00090      | 0.00062 | 0.00129 |
| Northeast | Male   | Black     | PWID | 0.00113      | 0.00083 | 0.00155 |
| Northeast | Male   | Black     | MSM  | 0.00051      | 0.00037 | 0.00070 |
| Northeast | Male   | Black     | MWID | 0.00080      | 0.00054 | 0.00116 |
| Northeast | Male   | Black     | HET  | 0.00072      | 0.00053 | 0.00099 |
| Northeast | Male   | Hispanic  | PWID | 0.00077      | 0.00054 | 0.00112 |
| Northeast | Male   | Hispanic  | MSM  | 0.00034      | 0.00024 | 0.00049 |
| Northeast | Male   | Hispanic  | MWID | 0.00054      | 0.00035 | 0.00083 |
| Northeast | Male   | Hispanic  | HET  | 0.00049      | 0.00034 | 0.00069 |
| Northeast | Female | White     | PWID | 0.00142      | 0.00098 | 0.00218 |
| Northeast | Female | White     | HET  | 0.00091      | 0.00062 | 0.00132 |
| Northeast | Female | Black     | PWID | 0.00115      | 0.00080 | 0.00162 |
| Northeast | Female | Black     | HET  | 0.00073      | 0.00054 | 0.00101 |
| Northeast | Female | Hispanic  | PWID | 0.00078      | 0.00052 | 0.00117 |
| Northeast | Female | Hispanic  | HET  | 0.00050      | 0.00034 | 0.00070 |
| West      | Male   | White     | PWID | 0.00165      | 0.00110 | 0.00246 |
| West      | Male   | White     | MSM  | 0.00074      | 0.00056 | 0.00099 |
| West      | Male   | White     | MWID | 0.00116      | 0.00078 | 0.00167 |
| West      | Male   | White     | HET  | 0.00105      | 0.00070 | 0.00158 |
| West      | Male   | Black     | PWID | 0.00133      | 0.00092 | 0.00194 |
| West      | Male   | Black     | MSM  | 0.00060      | 0.00043 | 0.00085 |
| West      | Male   | Black     | MWID | 0.00094      | 0.00061 | 0.00145 |
| West      | Male   | Black     | HET  | 0.00085      | 0.00058 | 0.00125 |
| West      | Male   | Hispanic  | PWID | 0.00090      | 0.00059 | 0.00135 |
| West      | Male   | Hispanic  | MSM  | 0.00041      | 0.00028 | 0.00060 |
| West      | Male   | Hispanic  | MWID | 0.00064      | 0.00039 | 0.00105 |
| West      | Male   | Hispanic  | HET  | 0.00058      | 0.00039 | 0.00085 |
| West      | Female | White     | PWID | 0.00167      | 0.00105 | 0.00267 |
| West      | Female | White     | HET  | 0.00107      | 0.00074 | 0.00159 |
| West      | Female | Black     | PWID | 0.00135      | 0.00089 | 0.00206 |
| West      | Female | Black     | HET  | 0.00086      | 0.00058 | 0.00124 |
| West      | Female | Hispanic  | PWID | 0.00092      | 0.00058 | 0.00147 |
| West      | Female | Hispanic  | HET  | 0.00059      | 0.00038 | 0.00088 |

**Mortality rates for PLHIV on ART (CD4 <200)**

| Region    | Gender | Ethnicity | Risk | Pt. Estimate | Lower   | Upper   |
|-----------|--------|-----------|------|--------------|---------|---------|
| South     | Male   | White     | PWID | 0.00798      | 0.00604 | 0.01086 |
| South     | Male   | White     | MSM  | 0.00556      | 0.00444 | 0.00704 |
| South     | Male   | White     | MWID | 0.00891      | 0.00662 | 0.01184 |
| South     | Male   | White     | HET  | 0.00498      | 0.00375 | 0.00639 |
| South     | Male   | Black     | PWID | 0.00718      | 0.00565 | 0.00895 |
| South     | Male   | Black     | MSM  | 0.00500      | 0.00407 | 0.00619 |
| South     | Male   | Black     | MWID | 0.00802      | 0.00597 | 0.01061 |
| South     | Male   | Black     | HET  | 0.00449      | 0.00368 | 0.00550 |
| South     | Male   | Hispanic  | PWID | 0.00616      | 0.00460 | 0.00826 |
| South     | Male   | Hispanic  | MSM  | 0.00429      | 0.00334 | 0.00546 |
| South     | Male   | Hispanic  | MWID | 0.00688      | 0.00499 | 0.00946 |
| South     | Male   | Hispanic  | HET  | 0.00384      | 0.00294 | 0.00501 |
| South     | Female | White     | PWID | 0.00856      | 0.00620 | 0.01190 |
| South     | Female | White     | HET  | 0.00534      | 0.00405 | 0.00706 |
| South     | Female | Black     | PWID | 0.00770      | 0.00591 | 0.00991 |
| South     | Female | Black     | HET  | 0.00481      | 0.00384 | 0.00595 |
| South     | Female | Hispanic  | PWID | 0.00661      | 0.00472 | 0.00928 |
| South     | Female | Hispanic  | HET  | 0.00412      | 0.00305 | 0.00550 |
| Northeast | Male   | White     | PWID | 0.00426      | 0.00317 | 0.00585 |
| Northeast | Male   | White     | MSM  | 0.00295      | 0.00226 | 0.00388 |
| Northeast | Male   | White     | MWID | 0.00475      | 0.00362 | 0.00646 |
| Northeast | Male   | White     | HET  | 0.00265      | 0.00197 | 0.00354 |
| Northeast | Male   | Black     | PWID | 0.00384      | 0.00297 | 0.00508 |
| Northeast | Male   | Black     | MSM  | 0.00266      | 0.00206 | 0.00341 |
| Northeast | Male   | Black     | MWID | 0.00428      | 0.00318 | 0.00599 |
| Northeast | Male   | Black     | HET  | 0.00239      | 0.00186 | 0.00301 |
| Northeast | Male   | Hispanic  | PWID | 0.00328      | 0.00241 | 0.00450 |
| Northeast | Male   | Hispanic  | MSM  | 0.00228      | 0.00171 | 0.00302 |
| Northeast | Male   | Hispanic  | MWID | 0.00366      | 0.00260 | 0.00510 |
| Northeast | Male   | Hispanic  | HET  | 0.00204      | 0.00152 | 0.00273 |
| Northeast | Female | White     | PWID | 0.00457      | 0.00323 | 0.00626 |
| Northeast | Female | White     | HET  | 0.00284      | 0.00205 | 0.00395 |
| Northeast | Female | Black     | PWID | 0.00412      | 0.00311 | 0.00558 |
| Northeast | Female | Black     | HET  | 0.00256      | 0.00196 | 0.00336 |
| Northeast | Female | Hispanic  | PWID | 0.00352      | 0.00246 | 0.00492 |
| Northeast | Female | Hispanic  | HET  | 0.00219      | 0.00161 | 0.00300 |
| West      | Male   | White     | PWID | 0.00566      | 0.00413 | 0.00796 |
| West      | Male   | White     | MSM  | 0.00393      | 0.00311 | 0.00507 |
| West      | Male   | White     | MWID | 0.00632      | 0.00478 | 0.00855 |
| West      | Male   | White     | HET  | 0.00353      | 0.00258 | 0.00484 |
| West      | Male   | Black     | PWID | 0.00510      | 0.00370 | 0.00716 |
| West      | Male   | Black     | MSM  | 0.00355      | 0.00268 | 0.00463 |
| West      | Male   | Black     | MWID | 0.00569      | 0.00412 | 0.00792 |
| West      | Male   | Black     | HET  | 0.00318      | 0.00235 | 0.00432 |
| West      | Male   | Hispanic  | PWID | 0.00437      | 0.00307 | 0.00616 |
| West      | Male   | Hispanic  | MSM  | 0.00303      | 0.00217 | 0.00413 |
| West      | Male   | Hispanic  | MWID | 0.00487      | 0.00333 | 0.00711 |
| West      | Male   | Hispanic  | HET  | 0.00272      | 0.00195 | 0.00375 |
| West      | Female | White     | PWID | 0.00608      | 0.00423 | 0.00860 |
| West      | Female | White     | HET  | 0.00378      | 0.00268 | 0.00526 |
| West      | Female | Black     | PWID | 0.00547      | 0.00386 | 0.00775 |
| West      | Female | Black     | HET  | 0.00341      | 0.00249 | 0.00469 |
| West      | Female | Hispanic  | PWID | 0.00468      | 0.00313 | 0.00682 |
| West      | Female | Hispanic  | HET  | 0.00292      | 0.00207 | 0.00415 |
